# Supplementary material for: Fusing metabolomics data sets with heterogeneous measurement errors
Source: PLoS One. 2018 Apr 26;13(4):e0195939. doi: 10.1371/journal.pone.0195939 (PMC5919515; doi:10.1371/journal.pone.0195939)
Supplement: S1 File — The file amines.csv contains the Amine metabolite levels of the patient samples. (CSV) [file pone.0195939.s002.csv]

order	label	3-methoxytyramine	L-pipecolicacid	gama-L-glutamyl-L-alanine	gama-aminobutyricacid	Beta-alanine	3-methylhistidine	o-phosphoethanolamine	L-asparticacid	N6,N6,N6-trimethyllysine	L-methioninesulfoxide	o-acetyl-L-serine	epinephrine	3-methoxytyrosine	sarcosine	L-2-aminoadipicacid	dopamine	L-kynurenine	N-methylhistidine	L-arginine	DL-3-aminoisobutyricacid	L-lysine	citrulline	ornithine	L-glutamine	L-histidine	L-alpha-aminobutyricacid	methionine	ethanolamine	L-proline	L-4-hydroxyproline	L-tyrosine	L-isoleucine	L-threonine	L-tryptophan	L-leucine	L-serine	L-alanine	L-glutamicacid	glycine	L-phenylalanine	taurine	L-valine	L-asparagine
2	0913BAC_01QC_A3	0.001016571	0.003129199	0.004595592	0.022858175	0.085449719	0.071894267	0.014059286	0.03978863	0.054493262	0.029747065	0.005666485	0.012279191	0.008643612	0.043260403	0.026274326	0.075789978	0.01041426	0.103475217	2.644986223	0.030433301	8.586707979	0.253301402	1.093802075	42.33707373	0.194545619	0.269329451	1.352911769	1.767883322	9.28183867	0.15257815	2.109289424	1.207411425	1.965711793	2.013241853	1.192737542	3.016512378	3.178155643	0.535694344	3.090370193	0.898022229	0.449272835	2.973046971	0.625196813
14	0913BAC_01QC_B1	0.000617865	0.001683866	0.003493082	0.009254247	0.072534134	0.08838305	0.00700765	0.040186322	0.040642988	0.026988985	0.004970903	0.010050034	0.007862428	0.042007702	0.022355979	0.045792313	0.015512542	0.123413126	2.464673482	0.025915095	9.011082921	0.306777448	1.154553862	44.13993751	0.208817721	0.297576575	1.380842306	1.519405505	9.663124767	0.170561085	2.186333857	1.323291723	2.053241274	2.074926077	1.215733103	3.140541773	3.19612272	0.523052796	3.428567517	0.885498673	0.458185049	3.116418277	0.691239446
17	0913BAC_0001_A1	0.000331888	0.001876708	0.005376209	0.010773532	0.06106544	0.10161168	0.009739586	0.036930107	0.029076621	0.036613745	0.0032451	0.00882158	0.00459519	0.038125175	0.022975694	0.043784418	0.014347635	0.097818065	1.844554716	0.02031465	8.376499993	0.157703256	1.138561155	31.74526841	0.162794665	0.222456689	1.340228937	1.354505362	9.57423869	0.174887383	1.847665348	1.208953316	1.958293164	2.402670769	1.256564894	2.52468566	3.604957544	0.391520327	3.144352183	0.851826745	0.540600263	3.121627515	0.61733161
18	0913BAC_0001_A2	0.000343882	0.002585417	0.005433958	0.010378944	0.057489841	0.07617455	0.013141637	0.032978677	0.026631323	0.031529601	0.003018125	0.008401297	0.008996589	0.037852902	0.016203896	0.042856991	0.012747744	0.101035863	1.996537035	0.021248883	9.773141999	0.166097706	1.186022517	32.35157831	0.16814701	0.211671515	1.352648954	1.476496229	9.6143326	0.164572985	1.960363321	1.227311897	1.996574688	2.266948364	1.219813513	2.437968119	3.688721148	0.40115976	3.177390909	0.858721993	0.510621966	3.17324419	0.605366359
19	0913BAC_0003_A1	0.00082792	0.002168629	0.00238326	0.010945435	0.092048843	0.236307131	0.008487795	0.040174132	0.040859163	0.043068351	0.00591023	0.007200786	0.006287055	0.033938641	0.020426926	0.050308916	0.016956998	0.091219676	2.320189863	0.048790431	11.17717406	0.218412084	1.256320681	37.94628023	0.164279755	0.376498228	1.257476819	1.30031849	8.225471725	0.131171146	1.834725385	1.328312498	2.300085528	1.971510689	1.213018902	3.251972033	2.828804006	0.607742552	3.850309521	0.750274338	0.579075726	3.030875121	0.633730018
20	0913BAC_0003_A2	0.000294638	0.002205435	0.004052035	0.010674035	0.095295109	0.206634509	0.006390533	0.037752903	0.047971724	0.038754546	0.006268404	0.007815327	0.00961529	0.028666175	0.02595452	0.054776247	0.017254971	0.134026669	2.329346659	0.050862659	11.51530547	0.222863805	1.242923614	38.62462027	0.171802892	0.372635197	1.307278636	1.317425289	8.142020932	0.123521594	1.858689662	1.365285718	2.288475817	2.001850339	1.244592027	3.361492063	2.889928629	0.600499606	3.85076975	0.759209388	0.536902881	3.050563942	0.628483351
21	0913BAC_0004_A1	0.00043065	0.001471026	0.003364099	0.010915419	0.072041705	0.16195727	0.008284932	0.056711547	0.043350256	0.060239018	0.007278388	0.007040481	0.00949717	0.028220707	0.021626908	0.053722351	0.015344199	0.094860874	1.837701589	0.031402116	9.67675104	0.197085702	1.343704736	37.09855854	0.159127797	0.322655211	1.027674734	1.143531385	9.791467685	0.112926239	2.054068255	1.150519615	2.023137681	1.593678078	1.006513175	3.017997622	2.683182443	0.494971681	3.512259254	0.731459219	0.430552566	2.945810105	0.575908333
22	0913BAC_0004_A2	0.000349832	0.001134447	0.003755321	0.012806864	0.0719728	0.150884219	0.006642257	0.068925836	0.026417117	0.064818774	0.00637061	0.007312012	0.008535505	0.031840485	0.022536721	0.042020174	0.014334056	0.081854351	1.966868226	0.032890209	10.16852887	0.197120472	1.215942593	34.87691228	0.167401649	0.315085299	1.061789642	1.13446182	9.310832997	0.118348199	1.944354371	1.162128523	2.059389421	1.528730052	1.031336445	3.07632923	2.659922068	0.493499038	3.433997114	0.678376691	0.432074959	3.081961774	0.568097147
23	0913BAC_0002_A1	0.00045364	0.003222258	0.003622759	0.008838535	0.094754082	0.062648508	0.007601318	0.031311913	0.032196406	0.043245575	0.021320949	0.007305812	0.0050411	0.052825728	0.026348697	0.048243543	0.012243709	0.082133055	1.952181629	0.021110401	10.14068663	0.242666394	1.298561231	31.31673739	0.162621482	0.205420287	1.371954223	1.256030483	10.5196882	0.103821462	2.235651648	1.324478208	1.819492544	2.226096869	1.27423348	2.406844893	3.307840498	0.427853687	3.025516332	0.877040339	0.393974505	3.268967083	0.588009573
24	0913BAC_0002_A2	0.000461428	0.001895654	0.006201921	0.00583079	0.102534099	0.07788371	0.008448657	0.032903588	0.035919763	0.041764827	0.021267792	0.006738169	0.005287037	0.049144505	0.026236814	0.05000431	0.012327487	0.089154227	2.202062301	0.020365219	10.91447246	0.242590508	1.116249535	32.79967977	0.173431525	0.207296936	1.364447125	1.401838978	10.05710367	0.109656752	2.243182474	1.36097214	1.766252461	2.17686968	1.288854734	2.365628812	3.365250385	0.43474355	2.982803616	0.87721643	0.400954035	3.186804447	0.590929295
25	0913BAC_0011_A1	0.000242314	0.000571869	0.002957416	0.019111224	0.05390781	0.034619962	0.005958114	0.023904275	0.044595734	0.037956734	0.011566755	0.007124775	0.008782129	0.042273486	0.014701005	0.049821319	0.011502519	0.073378131	2.321301762	0.012054428	10.18149175	0.348983642	1.252497261	47.34327366	0.193573568	0.106721286	1.412572148	1.599637981	10.93628879	0.188498492	2.424836408	1.601745784	1.90238265	2.266114338	1.518646616	2.646461011	4.265600616	0.307701533	2.896946032	0.926114354	0.221089096	3.516108014	0.777546188
26	0913BAC_0011_A2	0.000347077	0.000591057	0.003633283	0.012955125	0.053035997	0.045097635	0.008870336	0.030078474	0.036889579	0.04620986	0.011622613	0.007214246	0.007843463	0.045678526	0.014446776	0.048143023	0.009561392	0.083435835	2.328122269	0.011949244	9.806479878	0.338472645	1.350040251	46.25080146	0.191273174	0.106617745	1.355427718	1.513734842	10.54266201	0.179994649	2.456936485	1.625522225	1.933728149	2.202320327	1.452844701	2.734237567	4.142325534	0.29548237	2.99498471	0.989629488	0.207472199	3.524614596	0.696110093
27	0913BAC_0013_A1	0.000516358		0.002119434	0.009439068	0.048915001	0.019925705	0.007495005	0.058745139	0.024267011	0.026738797	0.003383575	0.008052679	0.00670224	0.038787132	0.017095427	0.050693633	0.007562595	0.0735332	2.154171392	0.024087199	9.806805766	0.324645739	1.286326804	50.55211666	0.171287987	0.234250938	1.186422816	1.097858771	7.644282743	0.125874924	1.766354063	0.808177229	1.923049126	1.360488734	0.784961142	3.090097932	2.676226931	0.929247403	2.622131928	0.583740668	0.170162762	2.077504277	0.59496325
28	0913BAC_0013_A2	0.000380794	0.000240688	0.002644976	0.006852514	0.049420752	0.021233563	0.007481265	0.049128706	0.027702645	0.038893607	0.00405258	0.008587393	0.008157461	0.046158737	0.013218643	0.038401314	0.007573711	0.069422511	2.165742014	0.022335712	8.469523433	0.314963125	1.262949512	51.66180582	0.176485233	0.241147767	1.161588659	1.152765504	7.974266335	0.125621731	1.784041759	0.808858885	1.825234862	1.306922589	0.749849571	3.018762886	2.673612952	0.926348189	2.584895757	0.564249579	0.177692767	2.085465188	0.602952572
29	0913BAC_01QC_B3	0.000275191	0.001645494	0.00263761	0.009785268	0.074972793	0.074493886	0.007956683	0.040322518	0.041478572	0.0238426	0.006817506	0.009561823	0.009835515	0.042292861	0.018711625	0.047238794	0.01159667	0.114877836	2.633889788	0.026549278	8.751030479	0.323421516	1.108680024	42.50253701	0.210468939	0.283897965	1.279092287	1.582796504	9.423895038	0.14840555	2.185554119	1.268409986	2.050297904	2.103219368	1.197201962	3.175548391	3.326905975	0.556948164	3.393994497	0.93702547	0.447741734	3.093445583	0.674878243
32	0913BAC_0012_A1	0.000547845	0.001082713	0.002910029	0.011169847	0.053754665	0.026882121	0.007628298	0.044493035	0.055488872	0.026078782	0.002235786	0.007994002	0.008513427	0.039017996	0.009345033	0.045867563	0.007100544	0.077380565	2.27777341	0.036065255	7.802866707	0.352457364	1.121490362	55.43523088	0.194764199	0.240512169	1.322786805	1.344304728	6.589424499	0.162767792	1.757218437	1.068161605	2.017260055	1.478133638	0.96304048	3.506087462	2.987070424	0.463791241	3.343509951	0.679628708	0.282786924	2.1581339	0.688887237
33	0913BAC_0012_A2	0.000261563	0.000452268	0.003991868	0.013606654	0.056476224	0.02745181	0.010120472	0.027006349	0.049865615	0.02316071	0.001837208	0.006748692	0.006591016	0.036965938	0.009426788	0.040342211	0.006544444	0.061616252	2.737526526	0.037899041	9.14068982	0.350073204	1.13544844	55.81774471	0.197457181	0.247865538	1.329307384	1.42522847	6.72066825	0.150370838	1.751539064	1.010705446	2.085016871	1.429262337	1.008838127	3.43811883	3.019928666	0.481731245	3.294172524	0.687605221	0.268481661	2.144232562	0.726030197
34	0913BAC_0010_A1	0.000426601	0.000570225	0.004413616	0.009421592	0.045140504	0.044587349	0.00645881	0.039898943	0.031930189	0.022025495	0.014393965	0.009591892	0.005705337	0.053130114	0.013567813	0.049002621	0.010156574	0.04231677	1.984411751	0.013097725	8.047767788	0.3564875	1.13521828	45.06322225	0.169842872	0.103077311	0.995816369	1.242015678	9.102267617	0.192779063	1.942941892	1.289162326	1.755533627	2.204406121	1.185258054	2.559018953	3.543133039	0.922375942	2.991041607	0.825232063	0.245335791	3.136133631	0.609245695
35	0913BAC_0010_A2	0.000348413		0.003593671	0.008692874	0.046858574	0.0349504	0.006359898	0.046280973	0.04755053	0.021993872	0.014654086	0.010143236	0.008923867	0.053687028	0.014139067	0.058051073	0.010423638	0.080046135	2.063362073	0.013387912	7.59967544	0.347064958	1.090194401	39.49750573	0.170486976	0.098265759	1.051527163	1.198039174	9.075308711	0.194093881	2.022439217	1.323296903	1.723036334	2.282580512	1.194014263	2.640372257	3.607484004	0.939899922	3.037728054	0.810893886	0.236213058	3.148518145	0.615930253
36	0913BAC_0053_A1	0.000364061	0.001270291	0.003505967	0.010544019	0.088901027	0.024308659	0.009886191	0.068807747	0.036382839	0.031704935	0.002940095	0.00781129	0.007644135	0.037274665	0.023522222	0.045804548	0.01080772	0.087679257	2.898405383	0.012356154	10.17210316	0.301036557	1.274768613	43.19221765	0.288980714	0.26158761	1.645894759	1.567581273	8.940001586	0.15385016	2.646241466	0.996334556	2.475633547	2.742512353	1.140899636	2.755497108	2.589388897	0.342889758	2.860402539	1.141589038	0.554562397	3.182221601	1.017076947
37	0913BAC_0053_A2	0.000455449	0.001644283	0.00202534	0.009309917	0.086229488	0.019501497	0.008745058	0.056828794	0.038103059	0.040338672	0.004250361	0.008414524	0.008914049	0.041474066	0.01911394	0.044342434	0.010776146	0.050475812	2.953427823	0.012108605	10.38728996	0.299976978	1.311410667	41.35085612	0.270258562	0.262369837	1.616671015	1.611215153	8.776713091	0.166822354	2.872213019	1.035053271	2.386864937	2.579171433	1.170031077	3.036225406	2.622282621	0.351368373	2.987204749	1.120533603	0.565857229	3.273001146	0.991895572
38	0913BAC_0016_B1	0.000576581	0.001370926	0.002717933	0.016127069	0.04394082	0.053300468	0.006382676	0.080572818	0.056797523	0.026711783	0.003671085	0.010745883	0.007763356	0.041824189	0.008668994	0.042348464	0.006653701	0.119353221	1.857000036	0.056149324	7.177186817	0.286711514	0.915176025	62.44587012	0.155095214	0.221026442	1.086185399	1.812778524	8.448866856	0.126311623	1.623846625	0.893845908	1.045842372	0.690218139	0.788852634	3.643029347	2.30699951	0.928867607	3.806974523	0.743469472	0.393584255	1.696052054	0.604402742
39	0913BAC_0016_B2	0.000596529	0.001336689	0.002949849	0.018489583	0.04632554	0.047969515	0.006109113	0.070114901	0.053461353	0.032296875	0.002887544	0.010602925	0.009147278	0.041165555	0.010399781	0.053783381	0.006014284	0.142675483	1.810947556	0.052103624	7.160606371	0.288919695	0.938630599	60.94077167	0.154837967	0.219901718	1.131195872	1.852175014	8.573687118	0.13246154	1.732849316	0.896240657	1.021074459	0.737157845	0.769637557	3.590135935	2.244293157	0.908442289	3.803966901	0.734002232	0.365691067	1.681541409	0.595905863
40	0913BAC_0058_A1	0.000417224	0.000986073	0.002662683	0.011021763	0.034941883	0.020702056	0.009205453	0.0361513	0.033577803	0.020826952	0.004513942	0.011817685	0.008458785	0.04483472	0.016686738	0.047344643	0.012491185	0.080708194	2.43774863	0.010753214	8.37842041	0.260607791	1.219736915	32.33879034	0.190360806	0.169569979	1.504947597	1.292933521	5.685199398	0.094492596	2.075152278	0.905611163	1.76915674	2.520558872	1.039410122	2.87127769	3.036340633	0.518726333	4.295395917	0.88940324	0.515134813	2.51918207	0.717980379
41	0913BAC_0058_A2	0.000411729	0.001465177	0.002591533	0.010027255	0.03730748	0.018829799	0.006383874	0.034123903	0.025850795	0.023864659	0.004174181	0.011018337	0.007721754	0.04587494	0.019168817	0.042312173	0.012013697	0.083730334	2.168128347	0.010229225	8.453420624	0.256103477	1.34991727	33.65617184	0.199587532	0.166276662	1.504223605	1.323447998	6.382307464	0.087557512	2.04562529	0.918806477	1.795745889	2.547004076	1.011507793	2.995646795	2.961111739	0.542315179	4.45666235	0.912002094	0.483950288	2.546139094	0.681631539
42	0913BAC_0052_B1	0.000491077	0.002845161	0.002284206	0.011399723	0.049711767	0.053972349	0.00635415	0.02196286	0.044520425	0.02345498	0.004611878	0.008137162	0.006336551	0.023264878	0.01994899	0.049192894	0.010688901	0.199673319	2.41893037	0.023248506	7.774269046	0.193535201	0.66197401	38.30130335	0.219297805	0.173563379	1.247508219	1.754085467	5.604743733	0.180806517	1.78779652	1.003586453	1.972109998	2.536616663	1.060331999	2.147792532	2.884727014	0.372059849	2.412683533	0.975049015	0.402109911	2.843055178	0.698220525
43	0913BAC_0052_B2	0.000504903	0.002379792	0.003988931	0.008599757	0.049465979	0.049522645	0.006446389	0.041280227	0.045887928	0.018387244	0.004356694	0.009557265	0.009915019	0.024109159	0.022710691	0.054429435	0.010169861	0.187132445	2.366851627	0.021480717	7.901013886	0.213065068	0.610216592	32.5995056	0.207898954	0.166864146	1.303268645	1.66817463	5.596035929	0.185220005	1.707475166	1.068347511	2.028889584	2.476440325	1.098845449	2.089791608	2.885153894	0.37419117	2.363628977	0.943940348	0.375403667	2.859883372	0.693872091
44	0913BAC_01QC_C1	0.000525923	0.001148489	0.004522429	0.007230686	0.046959567	0.089087802	0.005787843	0.033685617	0.026149633	0.029820333	0.005340725	0.010151244	0.006827666	0.037888666	0.021448406	0.048839262	0.013055851	0.129328447	2.51349395	0.024926576	8.47143684	0.249400786	1.095871798	40.7821872	0.186323625	0.285388115	1.410880146	1.410734322	9.755968288	0.148375336	2.196285536	1.261239287	1.984807826	2.156190088	1.21184064	3.028472116	3.194402095	0.539279951	3.293942566	0.916366477	0.428966843	3.092505441	0.675087739
47	0913BAC_0057_A1	0.000414602	0.002487279	0.003180093	0.007161253	0.10949313	0.033349771	0.007312257	0.03703931	0.051010621	0.063750492	0.004282725	0.006049089	0.012817023	0.065402753	0.03461286	0.044935471	0.014349023	0.365916883	2.06756712	0.023710146	11.80924146	0.223154952	0.792808573	49.73783628	0.187402032	0.390157191	1.648046206	1.636153719	10.57625188	0.123072509	2.142924699	1.450357174	2.302451689	1.412197443	1.177773191	3.388431651	3.212344146	0.253749108	3.399165762	0.958309989	0.71012461	2.935759589	0.705082112
48	0913BAC_0057_A2	0.000653316	0.002291735	0.003842753	0.012853312	0.113628084	0.046227745	0.011248293	0.027251898	0.042932447	0.064755344	0.004396327	0.006494389	0.012213046	0.065310391	0.030540885	0.044202514	0.015449659	0.33071587	1.830875679	0.024564227	12.29312715	0.230301404	0.856776743	48.0450323	0.182275569	0.40628589	1.579123189	1.660963281	9.916107863	0.122949967	2.196014925	1.457776063	2.302453995	1.44022034	1.160443476	3.398000835	3.13140097	0.25813371	3.368854205	0.90505626	0.725648197	2.79904426	0.719792337
49	0913BAC_0054_A1	0.000534466	0.005081747	0.004041377	0.0114988	0.086165713	0.058694619	0.008589416	0.055110217	0.042589444	0.04802835	0.003029176	0.007237952	0.005286231	0.071146245	0.041058064	0.04898814	0.018279684	0.157453619	2.570508624	0.009259972	11.83354878	0.432092974	1.280523377	40.2753566	0.191221054	0.198858284	1.805903341	1.491418727	12.63512107	0.429027742	2.888755834	1.540865247	2.614210282	2.547208323	1.351759564	2.947429932	3.196906735	0.636299703	3.384765171	1.057934566	0.601408301	3.678070708	0.707882355
50	0913BAC_0054_A2	0.00076872	0.005923461	0.004730711	0.009797792	0.084353278	0.05671973	0.007779582	0.063160005	0.042425854	0.042574078	0.002586273	0.007744967	0.009193244	0.070698109	0.031092586	0.040926069	0.020057675	0.152086474	2.343706663	0.011476908	11.43511372	0.422816837	1.397630513	41.60001377	0.198493106	0.208430266	1.763571839	1.512703236	12.43410841	0.451689835	2.870751717	1.583494292	2.574711865	2.516736855	1.314053269	3.084371174	3.284769	0.63413024	3.406897015	1.097430771	0.627538764	3.64277432	0.718955226
51	0913BAC_0055_A1	0.00030273	0.004622156	0.00308424	0.018020956	0.103271826	0.043948198	0.006478425	0.027071187	0.045580679	0.043322395	0.002481449	0.005827799	0.007645229	0.078632151	0.033074961	0.049621476	0.018948207	0.128336838	2.172728255	0.009307742	11.17799342	0.333142833	1.21473621	38.35022131	0.175884527	0.203515373	1.342237248	1.539134982	12.58923749	0.34082554	2.91405481	1.241609342	2.371526138	1.967690017	1.126095617	2.469820023	3.339975605	0.322522814	2.654430142	0.949757741	0.458653361	3.723947641	0.64824851
52	0913BAC_0055_A2	0.000529618	0.004669131	0.004815132	0.00962985	0.104683555	0.042100599	0.00434385	0.03156726	0.047548208	0.052387807	0.001874135	0.005091011	0.008143719	0.07304741	0.039519212	0.047367897	0.019653957	0.127246976	2.551494113	0.010343523	12.53787553	0.32700067	1.112423467	39.93160089	0.168452072	0.196408785	1.531311699	1.499609142	12.91459821	0.303639777	2.925756807	1.221396305	2.318904527	1.965524578	1.109418046	2.494925267	3.420909657	0.328363965	2.6521691	0.948791152	0.443254286	3.49639508	0.597647664
53	0913BAC_0056_A1	0.00051595	0.002311865	0.004949034	0.017607617	0.10733269	0.031772863	0.006250768	0.046112013	0.054449124	0.039501174	0.00751271	0.008177516	0.012504859	0.067028494	0.024774938	0.048357954	0.012813195	0.353844455	1.864089918	0.020811938	10.30668645	0.257987701	0.839969369	44.38724524	0.167741512	0.406818852	1.656803717	1.625726085	9.149478602	0.12144613	2.00427263	1.364298886	2.355604929	1.68145865	1.143461559	3.397640601	3.627975978	0.794215291	3.647471609	0.957820238	0.917070765	2.711720979	0.664591443
54	0913BAC_0056_A2	0.000394739	0.002681482	0.004451978	0.007734761	0.107534248	0.044584116	0.008243579	0.057729189	0.043040873	0.042334733	0.007216052	0.008539232	0.008463707	0.064186329	0.03272096	0.038753803	0.014653471	0.377109975	2.054861564	0.020371796	10.00188336	0.241835976	0.900608553	42.48512078	0.171495868	0.384227902	1.543106412	1.675615235	9.459853688	0.138710293	1.883207552	1.40111168	2.246334594	1.624512974	1.17910233	3.549077456	3.587706319	0.78071955	3.679324695	0.939853167	0.946192857	2.620917247	0.663272394
55	0913BAC_0068_A1	0.000366436	0.001207377	0.004835835	0.011526321	0.049878728	0.015381584	0.007444675	0.038366963	0.048050523	0.029072333	0.002503203	0.010025198	0.008786427	0.02393286	0.016642423	0.062078588	0.007626968	0.072383086	2.006738398	0.012446873	7.595164125	0.134065524	0.656259678	53.66530407	0.191337217	0.412344605	1.188612522	1.366208768	8.936004781	0.090949983	2.472445474	1.078350932	2.477232836	2.240643549	0.868833364	4.718099497	3.381709844	0.42983382	2.830714196	0.655381558	0.390928524	2.333525317	0.640108797
56	0913BAC_0068_A2	0.00028468	0.001242677	0.004109008	0.010092588	0.049289209	0.017508563	0.006796459	0.037503114	0.050475079	0.030230302	0.003021158	0.010353231	0.00764086	0.025462657	0.01669267	0.046957624	0.00739898	0.092162664	2.166582505	0.010739259	6.999206233	0.140746133	0.588173031	53.42926124	0.188662352	0.408859168	1.262374006	1.422947332	8.781367844	0.087259959	2.549059469	1.046907659	2.53482714	2.292894198	0.881355014	4.79250401	3.422879306	0.442778265	2.799503683	0.647322607	0.364806965	2.35810544	0.66496832
57	0913BAC_0066_A1	0.000437023	0.000587414	0.003284558	0.006778714	0.047133412	0.034002599	0.005573871	0.043580571	0.035026263	0.044743516	0.002295667	0.008264671	0.007333892	0.040687377	0.021713462	0.04882192	0.010560301	0.085734326	3.192614863	0.01179954	9.433807966	0.260900106	1.237941646	43.10151716	0.228652611	0.323810576	1.475996188	1.422473378	9.993402931	0.103736977	3.22673215	1.168177194	2.962653572	2.553302898	1.230591745	4.149096657	4.107411219	0.376163041	2.342200927	0.959078841	0.48649503	3.02939087	0.713992743
58	0913BAC_0066_A2	0.000426979	0.001235392	0.004058983	0.00719122	0.045752799	0.032508623	0.006466311	0.041887027	0.031173882	0.046141356	0.001861446	0.007546486	0.00621447	0.032000858	0.018500986	0.049846494	0.011136943	0.090923991	3.021351287	0.010260163	9.566545136	0.247350071	1.198527078	48.31775223	0.255650415	0.316367995	1.52427794	1.315725828	9.782916193	0.088344098	3.179984699	1.139089711	2.861439969	2.436280196	1.287900931	4.54456495	4.055410277	0.382734027	2.350363611	0.955448525	0.475836603	3.210209418	0.731481453
59	0913BAC_01QC_C3	0.00027606	0.001354622	0.003184173	0.010015267	0.051066943	0.062867037	0.005165858	0.035158722	0.049324375	0.029816318	0.004656208	0.008553082	0.007755283	0.033076139	0.01984677	0.041268195	0.013685285	0.120623616	2.479718293	0.025166349	9.374814553	0.254644564	1.109809501	44.02792535	0.199393003	0.284296622	1.306696698	1.593440349	9.636411635	0.161507239	2.224721808	1.240560587	2.01369906	2.141128134	1.214193431	3.014196675	3.259619124	0.52890243	3.469908145	0.872259379	0.450403646	2.939206277	0.670113045
62	0913BAC_0067_A1	0.000642074	0.000919364	0.005952906	0.008509476	0.044562124	0.014249767	0.010387743	0.055665351	0.028552705	0.025145216	0.009190278	0.009609498	0.005874135	0.036044085	0.013934507	0.052767511	0.010267796	0.083713886	1.839096202	0.015416848	7.255730896	0.148594558	0.683411311	46.70471528	0.203723463	0.36701805	1.558616286	1.530917225	7.573608471	0.102693997	2.552520559	1.281826676	2.535352267	2.775843393	1.063595955	5.185687936	3.555433662	0.770031023	2.915872893	0.753441301	0.418605092	2.395098783	0.71987146
63	0913BAC_0067_A2	0.000383016		0.005387137	0.013337677	0.045107622	0.012481106	0.011046279	0.056180468	0.035963725	0.033704693	0.01046047	0.009387258	0.008451538	0.037250161	0.014806872	0.042198837	0.010312167	0.089442441	2.121087583	0.013828771	5.946153719	0.140409141	0.670174568	54.29952887	0.210398522	0.378872661	1.476253962	1.547588192	8.360844471	0.097435707	2.426672433	1.328178138	2.568913368	2.593031281	1.058866104	5.144596439	3.532181908	0.769702178	2.893251043	0.723049876	0.413857599	2.465422708	0.687460817
64	0913BAC_0065_A1	0.000613573	0.000902588	0.00288288	0.005573952	0.043716282	0.038720392	0.007658636	0.049794137	0.034786465	0.044356598	0.002379549	0.008415219	0.007144928	0.05156745	0.027044561	0.045171125	0.012552467	0.070704284	2.450683754	0.010511917	8.229688934	0.246207498	1.267149998	42.27977652	0.215565675	0.28788191	1.580235384	1.221915173	9.285603218	0.115864941	3.521304074	1.297318642	2.926984615	3.759378023	1.404815311	4.61890547	3.891545945	0.714521872	2.309754423	1.014930365	0.485270922	3.511034466	0.698438394
65	0913BAC_0065_A2	0.000487232	0.001057684	0.003207632	0.006785979	0.044064374	0.042413277	0.009034225	0.059700778	0.028355179	0.048789388	0.00297541	0.007100684	0.008166445	0.048155068	0.018109072	0.047627194	0.011896023	0.096693355	2.770498561	0.011228267	8.323129773	0.238911764	1.180466791	42.24237669	0.22324382	0.296079406	1.543175818	1.285503315	9.303652316	0.114365983	3.415048356	1.263176431	3.081546827	3.636212761	1.405999345	4.315056222	3.846348974	0.69187715	2.417183098	1.042446585	0.463148323	3.411531204	0.692070871
66	0913BAC_0063_A1	0.000213042	0.001727344	0.003182309	0.01190869	0.093936926	0.024536169	0.008977859	0.035249805	0.038728626	0.037228024	0.002527753	0.008326643	0.009506653	0.037440745	0.009650472	0.044765077	0.006696758	0.096565026	2.656954322	0.015366719	6.448719144	0.425544464	0.878623271	43.63966317	0.197996653	0.197002466	1.054963454	1.361642803	8.760200679	0.098775387	1.600806789	0.7629171	1.30064079	1.284361295	0.672849091	2.912051662	2.543886423	0.351948928	3.047664327	0.660595141	0.425164655	1.921584362	0.527463484
67	0913BAC_0063_A2	0.000892002	0.001404147	0.002805553	0.008572976	0.092652236	0.019639146	0.009213732	0.038943954	0.040660147	0.053374344	0.003510187	0.007856254	0.009422066	0.032039346	0.005744734	0.044418348	0.007503923	0.107866596	2.3343858	0.015018898	6.642226195	0.426968459	0.836009831	44.07139949	0.197758708	0.199566167	0.990356684	1.48302986	8.729262492	0.104186812	1.641708353	0.754095675	1.303036838	1.193034997	0.666530908	2.782283606	2.533823308	0.358260172	3.013813721	0.641936447	0.442609138	1.895683406	0.517151846
68	0913BAC_0061_A1	0.000450153	0.00188351	0.006303481	0.010134607	0.070686539	0.186258202	0.00688338	0.046263452	0.064790878	0.031760919	0.002234214	0.007920044	0.010145573	0.044522622	0.018731316	0.051303811	0.013725895	0.103953959	2.468645382	0.012568271	7.437433801	0.429818902	1.118794272	43.751408	0.22490054	0.248162493	1.022500455	1.560342302	10.73078076	0.10018074	2.03059252	0.95228585	1.565517931	2.25400753	1.039732688	2.902434093	3.154695858	0.73332551	2.749726077	0.810487103	0.354169748	3.347485398	0.622624901
69	0913BAC_0061_A2	0.000581332	0.001942047	0.004292158	0.011885822	0.067409314	0.164963067	0.010314123	0.048432946	0.036462002	0.032349673	0.003288627	0.00792269	0.007365409	0.044742384	0.023064649	0.046357983	0.012128705	0.104923116	1.7860929	0.012684394	8.786119585	0.440720612	1.181050801	42.74503119	0.255073761	0.252120806	1.112392941	1.496395525	10.78836095	0.101229269	1.9776426	0.942599636	1.616383866	2.221513917	1.04652162	2.902309462	3.180756384	0.690499622	2.830127811	0.834989049	0.378023921	3.099793682	0.621997269
70	0913BAC_0060_A1	0.000487493	0.001553993	0.003015943	0.007490792	0.06719702	0.243509288	0.00948658	0.04580329	0.04969759	0.020487749	0.005436518	0.007695892	0.007371006	0.03585382	0.018578361	0.049828809	0.011761354	0.104581245	1.91701117	0.018789484	7.770061778	0.27165229	1.015695823	40.11908116	0.216918432	0.211083617	1.117564398	1.580841675	8.308721449	0.119928561	1.882676904	1.079817088	1.625874218	2.489230733	1.136595551	2.940196148	2.758834406	0.712826986	2.666947742	0.90642165	0.41816243	3.149896176	0.594519078
71	0913BAC_0060_A2	0.00049169	0.001524399	0.003057473	0.006522746	0.063371245	0.240095192	0.012808136	0.055345593	0.036884702	0.019094891	0.006246568	0.006640206	0.007061634	0.03197926	0.020711646	0.051023469	0.012810558	0.127161338	2.144058878	0.016014889	7.944142936	0.269892831	0.989828738	43.27185323	0.228226429	0.210648831	1.189875873	1.511715132	8.645797608	0.118508327	1.882230421	1.067172875	1.625756387	2.5648208	1.154447847	2.829224915	2.724923686	0.744138115	2.620672973	0.862161727	0.418619359	3.103885519	0.627035056
72	0913BAC_0062_A1	0.000551969	0.001180266	0.005017213	0.012938072	0.06737919	0.023840059	0.014743015	0.033022447	0.049619181	0.025314565	0.002076782	0.005695423	0.008873186	0.027578413	0.007970055	0.052842888	0.006802078	0.126603211	2.87596281	0.017723699	7.135847564	0.392730343	1.025271752	45.41512211	0.205581654	0.186707276	1.198597643	1.687217499	8.229367713	0.102698176	1.763440547	0.872398773	1.353757573	1.277628316	0.82101986	2.792899571	3.147170072	0.349030616	3.344220521	0.777724923	0.546395881	2.053858316	0.569822251
73	0913BAC_0062_A2	0.00034605	0.001706543	0.00305307	0.013375001	0.069565732	0.026894053	0.01453188	0.041292778	0.042591897	0.028202199	0.003314525	0.006256223	0.008111355	0.028835944	0.010612697	0.0446822	0.007156177	0.125155225	2.562169453	0.0150705	6.903578541	0.417964682	1.0304257	41.60844577	0.200850525	0.187776903	1.176764341	1.716549022	8.506166532	0.10838966	1.769386028	0.890301663	1.350995735	1.224072649	0.833447266	2.851589998	3.086372025	0.344467412	3.285648278	0.808876711	0.532326812	2.026031153	0.562296785
74	0913BAC_01QC_D1	0.00073239	0.000884982	0.002942094	0.015191349	0.098649967	0.086198154	0.007557804	0.043217131	0.027681559	0.031922811	0.005609543	0.010020692	0.006177271	0.03235463	0.016808961	0.049117827	0.010573713	0.099242931	2.141299685	0.023621116	8.463411895	0.241947047	1.004387395	39.54698076	0.154525458	0.263057437	1.191770758	1.434021195	8.364016332	0.143370513	2.018290047	1.140774519	1.861881879	1.951422428	1.077177494	3.005691965	3.007230374	0.518797721	2.991868694	0.846633869	0.390563719	2.859266358	0.602006823
77	0913BAC_0052_A1	0.000446811	0.001376203	0.003699096	0.010888843	0.079921943	0.056127011	0.0049232	0.030466035	0.032604793	0.026958183	0.005075245	0.006184444	0.007600458	0.025154724	0.019901923	0.047541535	0.010088262	0.174094324	2.148114625	0.022761383	7.713414031	0.226790348	0.526236001	32.05379522	0.208249734	0.168133935	1.300168241	1.631729023	5.513281811	0.17765461	1.632406487	0.982567576	1.986762848	2.567763168	0.995094799	2.125503358	2.837908183	0.355235666	2.264569058	0.930475076	0.376718499	2.807359853	0.66849403
78	0913BAC_0052_A2	0.000424013	0.001399712	0.004231691	0.010372606	0.07742386	0.05652923	0.00705324	0.033273538	0.033525763	0.025346443	0.004530646	0.006192312	0.007536906	0.028663531	0.019265298	0.05237349	0.011459956	0.211198231	2.469551344	0.020310886	6.962765495	0.206078311	0.572881459	32.55168325	0.209514159	0.160758995	1.322758543	1.630193853	5.558865463	0.183169859	1.68305033	1.024664258	1.964598517	2.513531109	1.015222398	2.210128191	2.824488234	0.357477845	2.252181399	0.980523287	0.385331177	2.904503922	0.684786316
79	0913BAC_0070_B1	0.00028402	0.001240294	0.00166531	0.008395604	0.043815719	0.015917095	0.005339563	0.045866253	0.037113093	0.023889013	0.003511649	0.006485618	0.007459786	0.027316037	0.023514164	0.044739633	0.01165274	0.12125352	1.985826521	0.026313993	9.253312693	0.308328535	1.269521849	37.24384364	0.180937338	0.276306674	0.888649789	1.252782747	7.699431223	0.071023105	1.911137765	0.845859712	1.491049381	2.111711628	1.039883701	1.973892101	1.683465514	0.881883705	2.206636119	1.268360264	0.56284578	2.812961915	0.528649256
80	0913BAC_0070_B2	0.000495401	0.001535095	0.002482875	0.010261901	0.044992326	0.017868282	0.006624915	0.043154717	0.026251696	0.02594891	0.002968925	0.008142032	0.007619503	0.028517203	0.023254711	0.046861079	0.012470193	0.115969083	2.727219365	0.026360866	8.57622016	0.306972008	1.375104875	36.29665531	0.180884177	0.264595268	0.877480991	1.196528475	7.365664497	0.071649412	1.807190113	0.938366607	1.527675343	2.128268181	1.040622941	1.883990329	1.664719983	0.882236926	2.22724356	1.205292274	0.55338853	2.658981816	0.55322206
81	0913BAC_0064_A1	0.000452597	0.00324668	0.002239552	0.009367784	0.046480371	0.295366473	0.014262553	0.038260069	0.065585354	0.029258151	0.004138769	0.00773062	0.006616886	0.01921256	0.017349773	0.042647487	0.010335874	0.128823649	2.581150638	0.034040912	11.7031105	0.218593333	0.770132553	28.47888059	0.279339032	0.22558951	1.414727509	1.163221619	6.350473025	0.129126714	1.502300866	1.177448377	2.843665263	2.908969839	1.276790134	2.862738793	2.602078506	0.310664847	2.221644446	0.915291859	0.445528366	3.394391013	0.818218301
82	0913BAC_0064_A2	0.000671281	0.003497661	0.002085192	0.01020322	0.04766141	0.331024171	0.012537275	0.05770194	0.046346205	0.025386443	0.003295531	0.006019889	0.00613408	0.019550992	0.023567405	0.056269163	0.010423727	0.144698503	2.685835082	0.037074326	11.64666009	0.227249185	0.789773745	31.08217499	0.253865568	0.22262554	1.506392304	1.179123961	6.185027498	0.119598605	1.584575059	1.227435346	3.161083862	2.84491836	1.293954102	2.888144444	2.605728762	0.304441903	2.280547146	0.895402572	0.447308612	3.443524337	0.79519765
83	0913BAC_0059_B1	0.000346516	0.001720381	0.005293143	0.013373769	0.099075392	0.030272763	0.005752127	0.032090431	0.031954252	0.048434076	0.00252875	0.004914859	0.005580183	0.068070951	0.023745846	0.041366788	0.010263936	0.074143364	3.072361964	0.031377356	11.76124878	0.570922153	1.431060404	42.3838739	0.181967461	0.215726909	1.664502288	1.481682336	10.35089941	0.113882149	3.462721243	1.452681103	2.401610568	2.766725438	1.558740582	2.531247847	4.74612522	0.491508431	2.978766965	1.114021973	0.291059712	3.932343643	0.831325319
84	0913BAC_0059_B2	0.000299771	0.002039369	0.006694683	0.017272763	0.096142481	0.02896606	0.006623253	0.025382135	0.02151977	0.048909155	0.003052514	0.005598929	0.007933113	0.065728131	0.02825345	0.047291469	0.009996106	0.093012236	3.36472042	0.036447538	10.95560397	0.564302438	1.692654144	39.84797899	0.174258437	0.218828506	1.54043201	1.486865892	10.83218498	0.118239269	3.335738232	1.385067036	2.496095013	2.82698123	1.507866043	2.468358806	4.753196184	0.51581585	3.098655983	1.05833554	0.303376951	3.996612053	0.823312447
85	0913BAC_0009_A1			0.004404505	0.004942191	0.066981743	0.010877915	0.006209509	0.031798632	0.036840192	0.045726524	0.017730413	0.007524728	0.006208765	0.051443018	0.012599021	0.048000914	0.010075863	0.062336768	1.987291366	0.006525019	7.104701545	0.16142527	1.311887123	50.37790435	0.219613788	0.115466921	1.520212754	1.945554561	10.41862906	0.236519586	2.276139832	1.098909184	2.297115477	2.447931054	1.189483991	2.995502639	2.553707316	0.157673307	3.636333558	1.007001759	0.519429172	2.844712394	0.850174385
86	0913BAC_0009_A2	0.000480266	0.001169272	0.002931031	0.00543544	0.068066843	0.010285056	0.004685771	0.029201352	0.042400695	0.05283356	0.018659412	0.007027344	0.007510614	0.048856523	0.008571323	0.05333807	0.010933813	0.063724379	2.366857502	0.007839506	7.613555372	0.159648662	1.331402758	44.73580289	0.247962856	0.117531184	1.536709114	1.933817023	10.7405307	0.23702164	2.330207329	1.095143556	2.28244372	2.285057052	1.2017359	2.967640018	2.624053127	0.153396046	3.756753519	1.041873607	0.51848774	2.866691315	0.852320709
87	0913BAC_0035_B1	0.000534027	0.000807076	0.003268585	0.010749109	0.101656501	0.025112346	0.006829152	0.069425994	0.028665563	0.030746359	0.003254121	0.004853087	0.006999137	0.041698289	0.016379685	0.049396604	0.011545778	0.070615218	1.841263098	0.028932814	8.662829624	0.212131373	0.90988201	36.13747167	0.208258749	0.256542183	1.369737076	1.786363116	6.911284124	0.094215446	2.299544657	0.974467765	1.428880205	1.586823963	1.260550897	3.748227796	2.920230656	0.36476231	2.784972378	1.175879539	0.340709231	2.939858195	0.632524897
88	0913BAC_0035_B2	0.000422939	0.000750315	0.002366019	0.013682437	0.097681971	0.036162842	0.007279173	0.06700509	0.030634995	0.02960184	0.002660676	0.005781622	0.009081778	0.034947796	0.015117235	0.047889135	0.010595924	0.095951088	1.821479792	0.029743205	9.753631764	0.213349425	0.845829124	37.2206426	0.207981956	0.262411779	1.248853469	1.951555317	6.641603184	0.086863887	2.433727738	0.949702741	1.41773299	1.601224613	1.256156333	3.962830828	2.807292501	0.366408758	3.015143743	1.161524178	0.358615567	2.941610097	0.658288037
89	0913BAC_01QC_D3	0.00047823	0.002067957	0.003410386	0.013439139	0.100369206	0.070710178	0.006171749	0.040235928	0.036102966	0.029329802	0.004247811	0.010528609	0.010465743	0.030758714	0.016720229	0.053034137	0.009526776	0.10241624	2.488058789	0.025612633	8.042611046	0.241856748	1.011347539	39.63750176	0.169323178	0.262514502	1.149918184	1.480945037	8.870416783	0.138208828	1.996713427	1.157233846	1.829085002	1.900273402	1.078712005	2.935642762	2.990197893	0.498077061	3.117907165	0.805434962	0.38332339	2.861718203	0.602475125
92	0913BAC_0059_A1	0.000375263	0.001465484	0.00596013	0.014767755	0.107265933	0.030011329	0.006157878	0.04171832	0.037714113	0.032057512	0.002128592	0.005957588	0.005516144	0.064014667	0.023503009	0.049237109	0.01166957	0.079404821	2.597337392	0.031625996	11.12549529	0.485556724	1.607516093	39.04063633	0.178403638	0.204244895	1.526318985	1.47400353	9.980439168	0.104616176	3.182060604	1.41298145	2.305746567	2.549510345	1.4757248	2.567397588	4.466609463	0.483088659	2.85881809	1.027242272	0.300852784	3.695752874	0.838740676
93	0913BAC_0059_A2	0.000388518	0.001267016	0.004643403	0.011434478	0.099588932	0.029788748	0.008954482	0.036864223	0.03045728	0.032545416	0.002259006	0.007025736	0.006760403	0.055005507	0.02536363	0.047347518	0.011984673	0.091525942	2.950673856	0.033873874	11.54558977	0.476889216	1.419168402	40.14416645	0.182278975	0.205296002	1.586772601	1.342572618	10.01711417	0.107634003	3.023350091	1.307162835	2.257781763	2.52194469	1.455125313	2.488899339	4.51798196	0.452742573	2.941590398	1.040811911	0.305155483	3.748609249	0.808469957
94	0913BAC_0041_B1	0.000767207	0.000563435	0.004096036	0.017170196	0.06109147	0.022983627	0.013896241	0.049490283	0.033742768	0.049035679	0.004639879	0.009823458	0.008394396	0.046160274	0.023894678	0.040841056	0.011044977	0.108875798	2.38059026	0.053965762	9.180471975	0.220631701	0.908621634	41.13188949	0.199370585	0.598656097	1.616841564	1.744808538	7.623436422	0.161852023	2.272787689	2.269258588	1.861537381	2.371793201	1.673370014	3.101883912	3.018524946	0.492796907	4.007716396	0.888512987	0.440758006	3.199888586	0.771236027
95	0913BAC_0041_B2	0.000551722	0.000827823	0.003190578	0.016633339	0.064192996	0.021775361	0.013562451	0.05392097	0.035112326	0.040063247	0.004397517	0.007775164	0.009762281	0.047793299	0.02902072	0.050720772	0.014087766	0.129853927	2.341284216	0.051404789	10.60835876	0.217023706	0.9248963	43.1613378	0.201118875	0.579136471	1.618986117	1.759159333	8.60749488	0.177416161	2.396356834	2.246429527	1.893780953	2.283845671	1.734773216	3.139021801	3.072941368	0.517713655	3.999469615	0.927068468	0.460780809	3.147893621	0.784870171
96	0913BAC_0006_A1	0.000665865	0.000346175	0.004017358	0.007985491	0.063346038	0.220979499	0.006041726	0.044037056	0.050903947	0.037030139	0.003722723	0.005793041	0.011461808	0.043947765	0.012665231	0.051426498	0.012971063	0.142657682	2.546747715	0.038852173	7.344547722	0.40630111	0.999635296	43.73707649	0.204389024	0.184220872	1.423329199	1.390276626	5.848743026	0.096045963	2.016623812	1.001034739	2.320877382	2.060215804	1.044918483	3.073129615	2.926069816	0.34788452	5.119926777	0.86437432	0.56287023	2.691085093	0.634536016
97	0913BAC_0006_A2	0.000556388		0.003862001	0.009311927	0.062133168	0.227830051	0.005855285	0.036267042	0.048285197	0.031175962	0.005240792	0.006143569	0.012164019	0.039736773	0.014304172	0.052871135	0.013570079	0.148114015	2.633252687	0.043992506	7.450406179	0.386450895	1.051914277	44.21670667	0.197712035	0.17973649	1.38822886	1.412244143	6.148331188	0.104855293	1.993655028	1.026828791	2.195730143	2.034777845	1.054595421	3.076539264	3.000903784	0.352717213	5.056220617	0.860010962	0.544506879	2.69339479	0.630106868
98	0913BAC_0007_B1	0.000678544	0.000340138	0.005074466	0.014679915	0.086053928	0.070438019	0.007670659	0.028440557	0.061976266	0.030865141	0.005236348	0.008055091	0.00911353	0.026329008	0.015588963	0.051382099	0.017239082	0.103400302	3.243687581	0.063654278	10.57668525	0.311023797	1.448842968	43.10273318	0.247103557	0.27505618	1.722600924	1.513438421	10.82567014	0.235581678	3.265141981	1.287210734	2.618534995	2.602748914	1.265415058	3.901487094	4.010706643	0.390412265	3.816306441	0.985299206	0.505436044	3.244355535	0.773452762
99	0913BAC_0007_B2	0.000494241	0.000835005	0.004936935	0.015382066	0.085003314	0.096915249	0.009491268	0.035332175	0.052559543	0.034173793	0.004085777	0.008048666	0.010985253	0.022388789	0.015683863	0.040221997	0.016261041	0.124461071	3.407003621	0.071629207	10.00918291	0.303689694	1.33877733	38.54515952	0.227008681	0.281442437	1.635493838	1.710190419	11.92641509	0.227558499	3.176985939	1.298031351	2.543779733	2.652500913	1.247491541	3.716712325	3.88224473	0.406873353	3.818329798	0.969486358	0.48639157	3.168903878	0.740587693
100	0913BAC_0026_A1	0.00056193	0.00133482	0.003175996	0.004779478	0.051920128	0.037641029	0.009374746	0.035144899	0.047160737	0.034545333	0.00161185	0.008916181	0.010103671	0.02588863	0.017780216	0.049331497	0.013909442	0.110384227	2.348971138	0.036214023	9.055784274	0.325149204	0.831834952	34.18111435	0.247681684	0.127050302	1.528868083	1.455574517	7.103186219	0.143597488	1.449775979	0.94207112	2.920519884	2.129845297	1.096787644	2.832394453	2.968826669	0.221424853	2.861999928	0.837244993	0.3711202	2.72904388	0.807791072
101	0913BAC_0026_A2	0.000757298	0.002249363	0.001932679	0.005175718	0.053347696	0.035521838	0.012043819	0.034310357	0.033318262	0.035250975	0.002494085	0.008007027	0.006388593	0.030316184	0.014857824	0.051355227	0.011984257	0.103596709	2.44273661	0.036572921	9.103650934	0.303015483	0.759023982	32.51228611	0.232081573	0.130380576	1.638951671	1.318475708	7.243042568	0.155342812	1.505385302	0.91441104	2.810403053	2.130263516	1.121379857	2.59192989	2.940182871	0.226592138	2.86910762	0.887202422	0.364356295	2.46876194	0.814469026
102	0913BAC_0004_B1	0.000546987	0.001044483	0.00380078	0.00731419	0.121554207	0.177434431	0.00701889	0.041800013	0.039911783	0.053578957	0.00826882	0.006235845	0.009320406	0.04546035	0.026213772	0.045552494	0.016431596	0.12926801	1.905443741	0.044291006	13.33814977	0.218076933	1.36016811	47.49630613	0.175487164	0.384431637	1.289024859	1.393826311	10.88797138	0.117217421	2.30871334	1.290480564	2.294702526	1.833258925	1.181057226	3.404457647	3.02151694	0.569491103	3.948077605	0.789383621	0.482576185	3.340916408	0.632637802
103	0913BAC_0004_B2	0.000729655	0.001974401	0.003927263	0.009470711	0.12619693	0.193395338	0.007587458	0.037929213	0.057652909	0.057385761	0.00856849	0.006080779	0.006789836	0.038258803	0.027856893	0.047645201	0.01587955	0.104879752	2.288830531	0.046043365	12.36270914	0.234094268	1.402026734	46.2155912	0.181341913	0.385761211	1.357579561	1.428263812	10.69069967	0.120476071	2.399708377	1.380376152	2.230904209	1.738328946	1.204381955	3.299758218	3.061218564	0.585550656	3.961247083	0.809806597	0.482646998	3.367093598	0.633139971
104	0913BAC_01QC_E1	0.000851326	0.001047089	0.003247417	0.012913797	0.080700055	0.074639134	0.004730385	0.035821457	0.038033277	0.041018285	0.005892154	0.00894234	0.00838133	0.040423388	0.014571116	0.045811635	0.011087756	0.123430531	2.036005064	0.028063106	9.042664771	0.288515439	1.056924426	38.06535068	0.196795804	0.271090732	1.338733028	1.36280132	8.812443049	0.157565136	2.162634779	1.196525018	1.946616024	1.982146089	1.219358557	2.93509703	3.17981531	0.529835663	3.282532586	0.880067675	0.434362431	3.034190665	0.679097161
107	0913BAC_0015_A1	0.000508774	0.001348862	0.005000431	0.012922571	0.049301878	0.011455838	0.005395618	0.056275802	0.056823992	0.039761789	0.010375746	0.006256197	0.008010496	0.071111806	0.017056684	0.052998483	0.017569445	0.121834951	1.156620207	0.024743295	10.26469458	0.183042023	1.241729808	55.54625037	0.258667249	0.250218481	1.195077782	1.470323744	19.4511014	0.161955865	2.596545751	1.217608506	2.180311411	2.03620943	1.093534695	2.65463198	4.059722379	0.868974641	2.665660385	0.801684916	0.383909748	3.382349765	0.718306402
108	0913BAC_0015_A2	0.000594278	0.001347028	0.005665386	0.013815436	0.04993747	0.020426416	0.006451611	0.040135073	0.070536629	0.043438761	0.011623598	0.006423972	0.00514613	0.071558112	0.023061048	0.04797663	0.017392544	0.126447952	1.083789256	0.021355689	9.350252693	0.182337363	1.172059068	56.82812217	0.245404498	0.258107201	1.113592053	1.522273839	19.20088631	0.147042678	2.496354476	1.157765395	2.200524373	2.021730716	1.117576585	2.639829799	3.893972063	0.837679241	2.528619403	0.823239005	0.358351688	3.355898494	0.709094783
109	0913BAC_0016_A1	0.000435834	0.000516966	0.003277695	0.011259859	0.05725685	0.056069768	0.006372812	0.062999148	0.053068347	0.026635312	0.002631832	0.008810275	0.009213487	0.037757716	0.007704013	0.049526946	0.005965985	0.119797274	1.651291938	0.052072481	7.419059497	0.256166428	0.905662139	61.18448807	0.15220221	0.202912711	0.975645843	1.790342748	8.152717346	0.138698688	1.666346153	0.899621897	0.986692937	0.638975215	0.768624095	3.508422857	2.208761633	0.880765813	3.535973982	0.708080633	0.369775864	1.566728258	0.585856059
110	0913BAC_0016_A2	0.00085167	0.000867538	0.002617659	0.014457726	0.056014885	0.058597699	0.005776893	0.064983878	0.049294655	0.02555779	0.00311931	0.010167057	0.008259697	0.035145181	0.009884859	0.049179234	0.005053542	0.12405084	1.781616992	0.050900384	7.136496738	0.249745347	0.923952158	57.158901	0.159172324	0.216237901	1.031962644	1.640287713	7.850428681	0.125230992	1.673444668	0.924145525	0.967743828	0.684557506	0.728158037	3.675715887	2.25029417	0.864853514	3.788708145	0.719865452	0.360298429	1.630246536	0.591746013
111	0913BAC_0014_A1	0.000727285	0.001369118	0.005395823	0.012365613	0.05130695	0.018033505	0.007208905	0.071695935	0.051345079	0.032059499	0.006675559	0.009334049	0.007414167	0.060208583	0.019805104	0.05042525	0.016000425	0.16441399	1.429325867	0.019352211	8.667077068	0.151317715	1.03896101	47.7923404	0.255379275	0.20992284	1.199004919	1.30762063	16.27848872	0.161961269	2.203008603	1.273968828	2.094190293	1.949582485	1.155489272	2.581523098	4.057512303	1.175710063	2.727136279	0.887910806	0.446180628	3.08050759	0.742186808
112	0913BAC_0014_A2	0.000613904	0.000340669	0.006433599	0.012410233	0.051260694	0.01736345	0.006534274	0.061546134	0.048038347	0.043087095	0.006000118	0.008934133	0.011639181	0.062849845	0.021091011	0.045616926	0.01500202	0.11435264	1.444336661	0.020975608	8.730235599	0.143075309	1.101142552	47.15856245	0.267069462	0.220129758	1.232539989	1.268543775	16.50140765	0.168453299	2.232702777	1.247270692	2.080332178	2.023384656	1.216989952	2.662984154	4.080412676	1.179018252	2.649388169	0.846166399	0.437474487	2.901316503	0.701458109
113	0913BAC_0017_A1	0.000640042	0.000866803	0.002816566	0.012889388	0.052375227	0.051268538	0.004257693	0.024508362	0.050859305	0.021895366	0.007038302	0.007032575	0.010026674	0.032814722	0.00927673	0.052619449	0.008510794	0.117405312	1.174135374	0.046891371	6.066843214	0.177687137	0.760670445	53.98932181	0.134604648	0.199422775	0.696185787	1.424608044	7.736276119	0.115479591	1.519534095	0.596181062	0.90787292	0.566402246	0.502635096	2.909049925	1.84313973	0.423351149	2.922566134	0.514187826	0.274045948	1.411737511	0.499971388
114	0913BAC_0017_A2	0.000538101	0.000602922	0.002423822	0.009203195	0.04924521	0.047679481	0.004819793	0.026857426	0.043752437	0.030753578	0.006537533	0.008089096	0.010847249	0.0366033	0.011799274	0.055967049	0.006247887	0.092643824	1.167377125	0.047827343	6.062951074	0.165645029	0.822169062	53.06887998	0.131806774	0.18542834	0.688244194	1.414909388	7.905900902	0.104278904	1.498869589	0.608920652	0.899009502	0.601813691	0.512121195	2.94155875	1.851713041	0.416092863	2.930496874	0.545790434	0.267790638	1.418582944	0.504256859
115	0913BAC_0008_A1	0.00066593	0.000567516	0.002190595	0.008423621	0.04903862	0.029499367	0.00629103	0.033156961	0.044977617	0.023189919	0.012866854	0.006318506	0.007822845	0.026107709	0.014262724	0.052406645	0.008255595	0.11676556	2.268053055	0.018061308	10.09683737	0.218707796	1.27495515	45.06879568	0.23606332	0.419471693	1.383632582	1.340018419	6.761934827	0.118362467	2.052436536	1.236776608	1.985437834	2.165673116	1.511732519	4.799393917	2.514635608	0.389333784	5.145237685	0.844188381	0.525232523	3.357665057	0.786580793
116	0913BAC_0008_A2	0.000606459		0.002004201	0.00899801	0.050654562	0.033446226	0.006832507	0.035251809	0.047343116	0.023496121	0.01120063	0.007663132	0.007614603	0.022640681	0.01334508	0.048282231	0.008578016	0.090389334	2.14313647	0.016738295	10.27256241	0.212863746	1.287747183	42.97061428	0.236878432	0.407330575	1.458838925	1.446207936	7.073512694	0.111554202	1.975058896	1.187917374	1.882395519	2.140970087	1.480974039	4.826569404	2.515476175	0.3807412	4.940736371	0.847156462	0.492638667	3.546369645	0.74786189
117	0913BAC_0076_B1	0.000537196		0.002258762	0.006769763	0.097223526	0.077715371	0.011114893	0.08552057	0.024837403	0.031818024		0.00799213	0.006667098	0.034511263	0.030256198	0.049430611	0.008665131	0.109347952	3.105727682	0.029570745	9.36804577	0.558488957	1.599778067	38.97661633	0.202870353	0.411861569	1.012914109	1.175547867	7.254383369	0.148270049	1.552718927	1.355180887	1.610213268	1.835992704	1.22191696	3.584925041	2.042224524	1.031051711	3.427121805	0.772562703	0.341962328	3.017474744	0.593573746
118	0913BAC_0076_B2	0.000606196		0.002196052	0.009267619	0.097509191	0.08079499	0.008043497	0.07593585	0.030636948	0.031021627		0.008380271	0.008788116	0.035920447	0.026725346	0.053959719	0.00812222	0.12861239	3.266231862	0.027589387	9.435096737	0.550962614	1.682200567	41.42467656	0.192989019	0.414963654	0.981032163	1.221117112	7.270272907	0.146185679	1.559911666	1.261997142	1.586158244	1.824321157	1.233000111	3.466851453	2.025095379	1.056460618	3.403530423	0.797817336	0.324694214	2.940396914	0.607198854
119	0913BAC_01QC_E3	0.00064337	0.00079712	0.003821198	0.009840968	0.086004245	0.047144138	0.006046611	0.048354835	0.028104841	0.038508345	0.004189431	0.008188834	0.006038077	0.042891738	0.019511255	0.049399365	0.011448272	0.127589155	2.305985313	0.026161373	9.687745091	0.300059042	1.029465633	40.90447803	0.189614026	0.272096857	1.328885616	1.466341976	8.78285991	0.159803896	2.245852649	1.185786182	1.956675438	1.919725066	1.14401459	2.975734317	3.166037634	0.550446909	3.256415326	0.891554554	0.416783229	3.006818025	0.64391513
131	0913BAC_01QC_F1	0.000895322	0.000891494	0.004898663	0.015141179	0.05538924	0.053815822	0.00523529	0.048411014	0.045443251	0.039286725	0.004339747	0.009714132	0.008133793	0.045277144	0.022380295	0.052086817	0.012949529	0.107533232	2.494351256	0.026469079	9.061660452	0.298356373	1.158564515	43.6404736	0.197385477	0.300944343	1.364789309	1.644010288	10.0254602	0.167946935	2.30087489	1.281035951	2.085441246	2.23657556	1.28845675	3.175129293	3.349634185	0.571840259	3.658864989	0.978048536	0.450254158	3.309489924	0.684474183
134	0913BAC_0050_A1	0.000799959	0.00046189	0.00247479	0.012697994	0.059591557	0.015094431	0.005902595	0.042991947	0.048371256	0.040519498	0.001376973	0.006002256	0.005590435	0.050079792	0.012767981	0.055228895	0.007800374	0.123026316	1.801971192	0.019195454	7.777097707	0.220749136	0.682312309	41.8337616	0.131717982	0.326625515	1.065711315	1.130235975	7.411796747	0.094345803	1.794386807	1.179100379	1.511524345	1.597328674	0.969178246	2.880012752	2.601454071	0.290355272	3.145302482	0.686525507	0.404563836	2.375800777	0.593842927
135	0913BAC_0050_A2	0.000627152	0.000446437	0.001227489	0.007688268	0.061996261	0.015682785	0.008124728	0.039259516	0.037349087	0.044237329	0.001816328	0.005375779	0.00750945	0.049566654	0.011984067	0.044686888	0.00670257	0.11670723	1.96538282	0.019554228	7.97055972	0.213041851	0.645701946	39.92930779	0.135898303	0.331703247	1.166795003	1.084209201	7.197876775	0.096600846	1.772650509	1.198058793	1.515685986	1.480742164	0.914334323	2.925625368	2.645361094	0.280702687	3.116167357	0.68834306	0.401164177	2.33255701	0.604739163
136	0913BAC_0047_A1	0.001149842	0.000608702	0.002708684	0.007309153	0.057906141	0.126789778	0.009002862	0.025864842	0.036782953	0.034522393	0.005426412	0.006983232	0.008157176	0.055176104	0.021926935	0.050356743	0.008124333	0.116542804	2.350342039	0.031753588	9.859634842	0.297764262	1.36286765	32.68228995	0.19996296	0.445324955	1.264624584	1.131730202	6.867654615	0.170644971	1.906684424	1.344932962	2.106432035	2.236505345	1.447163188	3.143940058	3.137850205	0.345968218	2.549777598	0.922174759	0.40781178	4.106795327	0.719713503
137	0913BAC_0047_A2	0.000583456	0.000590947	0.002033379	0.004372811	0.057487721	0.132656473	0.009509317	0.022110798	0.042488595	0.038258808	0.007108693	0.006923586	0.007609403	0.062232848	0.025352667	0.053342894	0.008345255	0.096388328	2.70761803	0.035186408	10.35864032	0.302616389	1.266523815	36.36285228	0.18874953	0.450112663	1.228501861	1.222933306	7.069706448	0.178586048	1.989126667	1.290389779	2.158046706	2.26152708	1.486020411	3.030198681	3.133292262	0.338748602	2.582216578	0.935834389	0.393255609	4.014280106	0.711874252
138	0913BAC_0048_A1	0.000588215	0.001521613	0.003152079	0.008010584	0.053354074	0.081014452	0.007299045	0.043539301	0.019181607	0.026064517	0.003476327	0.006708368	0.007946458	0.058603338	0.025760197	0.042945995	0.009162913	0.099548519	2.211453177	0.030492743	9.205308957	0.358146094	1.254441215	33.41600127	0.184372295	0.427956514	1.171797086	1.045203011	8.12715	0.121752352	2.047644242	1.230270994	1.626440438	2.312764162	1.339810596	2.625564454	3.157988924	0.552834749	2.359683246	0.951006201	0.362844128	3.551945078	0.681656882
139	0913BAC_0048_A2	0.000990186	0.001272568	0.002509488	0.008552695	0.049399119	0.080084479	0.010380645	0.028064184	0.038721271	0.025283885	0.003544393	0.006403792	0.00777827	0.050221134	0.0267614	0.044917317	0.00823734	0.093565267	2.49665002	0.028855173	9.322044108	0.350097554	1.097001079	34.58600699	0.213276175	0.416195518	1.151234831	1.092228818	7.615063197	0.123243883	2.010728973	1.181379946	1.645773696	2.17364975	1.364796638	2.707460211	3.140975227	0.57782809	2.282131633	0.976694886	0.363544531	3.756296056	0.647764464
140	0913BAC_0049_A1	0.000585213	0.001769974	0.002557284	0.009724829	0.05385251	0.017023628	0.00529935	0.044942446	0.026765	0.0194708	0.00321713	0.008252614	0.008784179	0.04809931	0.011971266	0.054283371	0.005520345	0.113932341	1.987433626	0.028608217	9.841746972	0.204924453	0.792300892	41.01684526	0.164373771	0.372695265	1.348039555	1.289669767	6.371968659	0.09965037	1.76652304	1.44525117	1.752291756	1.086393711	1.179556713	3.682619656	2.855680937	0.406628207	3.716865353	0.699127761	0.502712264	2.47656256	0.676990121
141	0913BAC_0049_A2	0.000685215	0.000786024	0.002881939	0.013375794	0.059597371	0.015268257	0.005514531	0.034901586	0.047798807	0.018862156	0.002441288	0.008607943	0.009340056	0.045381596	0.009358696	0.051941761	0.004869803	0.139175936	2.193259112	0.030023529	9.139168045	0.206258411	0.712503504	41.86769932	0.149452809	0.360639915	1.307438284	1.121795097	6.511134674	0.097333759	1.731484935	1.333152136	1.719602529	1.150412579	1.163564281	3.491385523	2.88186449	0.414220198	3.516770983	0.681299884	0.502837994	2.529727526	0.67777001
142	0913BAC_0076_A1	0.000543432	0.00151902	0.001397367	0.014261807	0.098183002	0.081178996	0.010414862	0.066145055	0.036321205	0.023667685		0.006246008	0.005804904	0.034337095	0.031118564	0.047050488	0.007875861	0.122565198	3.086288933	0.033152329	9.755911422	0.5490649	1.551238324	40.36606396	0.18048552	0.425758257	1.026398391	1.20521532	7.858893127	0.131397574	1.633173644	1.356184407	1.670462779	2.011842823	1.267075301	3.446879064	2.062684112	1.0689658	3.728209877	0.779608533	0.327135969	3.103486472	0.616373784
143	0913BAC_0076_A2	0.000674135		0.001313034	0.013775591	0.095674201	0.097006358	0.009974963	0.061803449	0.036156353	0.027880605		0.006191699	0.008412769	0.031928417	0.031288267	0.040727536	0.008768167	0.136323272	4.108139102	0.031247189	9.056725005	0.557296093	1.650600062	40.57102953	0.193797389	0.418265192	1.066204934	1.176068138	7.350076938	0.140514449	1.656173405	1.359063427	1.666407806	1.880608492	1.291401182	3.559195277	2.080678432	1.066409388	3.599829021	0.812760737	0.33864591	2.901056275	0.630170148
144	0913BAC_0073_A1	0.000886448	0.001380027	0.00408036	0.007020883	0.102472586	0.043329565	0.008590108	0.067765774	0.02714529	0.030621977	0.006604274	0.004426433	0.007589729	0.038891629	0.018918247	0.052081028	0.009863187	0.077024865	3.372111383	0.020354454	8.270754168	0.619917925	1.383660233	30.28297156	0.206959407	0.139874429	1.337483405	1.399094954	11.44487281	0.190138848	1.879478899	1.31686252	1.975111815	3.093064726	1.387659123	3.020473961	3.567736242	0.738652807	3.894173011	0.901098467	0.408282316	3.403700732	0.687812974
145	0913BAC_0073_A2	0.000637425	0.001116479	0.003001831	0.00732669	0.097703711	0.042792943	0.0078148	0.078983462	0.040345505	0.031700848	0.005996975	0.005607811	0.009495901	0.045714273	0.019909622	0.054540108	0.008810211	0.090670359	3.818903757	0.019530901	8.113674841	0.610177926	1.417277265	35.98959381	0.221477252	0.143582507	1.246034026	1.502705754	11.02523391	0.193886108	1.892691344	1.307361645	2.072683068	3.116594502	1.307025325	3.204517596	3.57411772	0.712929601	3.93874968	0.857838311	0.419284378	3.473835455	0.67732938
146	0913BAC_01QC_F3	0.000458135		0.003487758	0.011766952	0.056330166	0.070572259	0.007367629	0.043668742	0.037418403	0.042596282	0.006013577	0.008073746	0.008067782	0.041298859	0.023341835	0.047611058	0.012723204	0.124580297	2.406495207	0.026081994	8.975340657	0.314147433	1.193239248	43.05506195	0.21656543	0.291777966	1.430092808	1.572018559	10.30919901	0.171185182	2.250217565	1.247931016	2.162963461	2.220951988	1.295420802	3.178976381	3.411095067	0.57117977	3.42296151	0.940656968	0.458989432	3.197048597	0.702636383
149	0913BAC_0075_A1	0.000742249	0.000497129	0.002464786	0.007016729	0.095540139	0.110032401	0.008201672	0.086393204	0.036348519	0.022303124		0.010447146	0.006445531	0.025447481	0.022341687	0.052862136	0.006978913	0.109681177	3.615299784	0.031055029	8.908243196	0.478377822	1.609029089	41.51348562	0.192870965	0.452224765	1.071754799	1.266286825	7.362331056	0.146554168	1.62786063	1.502451385	1.768045751	2.089048775	1.34049147	3.709929006	2.433292386	0.928773535	4.049593264	0.778864997	0.325281993	3.206609034	0.628032295
150	0913BAC_0075_A2	0.000656379	0.000439821	0.00235384	0.008066695	0.098722974	0.113591002	0.00755511	0.085209868	0.036588999	0.022957532		0.009942396	0.008889428	0.02527464	0.023468027	0.055342921	0.008010329	0.153619976	4.21523871	0.031913545	8.971554732	0.48727902	1.545003194	39.2294887	0.188336379	0.440484612	1.088954115	1.234209203	7.494513044	0.148172667	1.56557754	1.529720059	1.699388423	1.959335599	1.437778937	3.655452298	2.492153539	0.929912773	4.022106799	0.754457699	0.316074981	2.987105526	0.635747328
151	0913BAC_0074_A1	0.000792805		0.00255331	0.010859002	0.077681036	0.051330766	0.008508201	0.054122479	0.028671193	0.029076577	0.010201545	0.00671378	0.00569241	0.042095903	0.035392003	0.049321922	0.010534378	0.113187231	3.439209468	0.01706193	8.793224977	0.623892214	1.475154527	35.4945295	0.197960194	0.170307405	1.320655445	1.385967426	10.9918388	0.148649091	1.956840741	1.275176164	1.859334125	2.247012772	1.312408562	2.685409505	3.171402831	0.756757962	3.49256398	0.876265307	0.277290655	3.402196415	0.636958198
152	0913BAC_0074_A2	0.000702396	0.000773215	0.002599613	0.006319843	0.077125838	0.040677109	0.00589645	0.048756113	0.02443449	0.026258911	0.008561146	0.006294561	0.006889722	0.043854336	0.023678317	0.049200401	0.011428917	0.099965762	4.00223317	0.016027505	9.518999101	0.636874368	1.434324708	33.20931016	0.198790301	0.16100123	1.277258138	1.344116961	10.53834418	0.155645358	1.825034336	1.290651363	1.858057488	2.269598815	1.299341353	2.758036074	3.067345591	0.737585785	3.592115043	0.895244655	0.276092126	3.821503732	0.652398085
153	0913BAC_0028_A1	0.000829029	0.001165547	0.005442345	0.014099801	0.08121839	0.062790601	0.007882662	0.035377336	0.051779499	0.029624173	0.0021173	0.004131545	0.007499361	0.030881159	0.023382626	0.055582955	0.01663108	0.114865121	2.343718715	0.038207937	8.133334365	0.205614086	0.943919844	45.37832335	0.166957679	0.264465957	1.361803701	1.320490964	10.79299554	0.44119041	2.269857772	1.396656748	2.048632278	2.367039423	0.989873895	2.743274096	4.824542061	0.529501302	5.514434788	0.852591414	0.446559472	2.929854833	0.791033127
154	0913BAC_0028_A2	0.000629635		0.007167196	0.011661166	0.083497236	0.070996227	0.007107728	0.039016297	0.042841376	0.037235269	0.001549563	0.003114454	0.008784927	0.03571882	0.024621066	0.051952757	0.015253282	0.133671133	1.887437256	0.03358051	8.501877607	0.224534204	0.931661669	45.72778186	0.183012973	0.279024685	1.313647848	1.285800616	10.3876419	0.41183556	2.241647179	1.342853907	2.049394304	2.330821138	0.975167743	2.87451381	4.974809751	0.525753857	5.733908173	0.825718655	0.427248512	2.893601632	0.750501632
155	0913BAC_0067_B1	0.00055364	0.000546737	0.003742208	0.004754901	0.114119363	0.005907793	0.008368889	0.051257189	0.036647923	0.038050728	0.007341805	0.009584153	0.007444176	0.031949639	0.012892925	0.048285599	0.009375233	0.075145645	1.711558754	0.011680625	5.661013489	0.13313986	0.506903972	46.43794186	0.17171718	0.33100263	1.37979043	1.388788541	6.659309826	0.083744094	2.294505991	1.111360521	2.181945721	2.337254139	0.939914354	4.405631345	3.076697157	0.673716752	2.594750283	0.691685078	0.386104631	2.145153754	0.58810123
156	0913BAC_0067_B2	0.000717851	0.000754666	0.00343546	0.004776151	0.107838688	0.009754264	0.010371578	0.045806079	0.050324698	0.04197814	0.008734085	0.010574089	0.007401323	0.034679007	0.011726957	0.056528407	0.008828925	0.08086299	1.473550355	0.011257585	5.702293242	0.117743896	0.610893529	49.60185142	0.173981192	0.335135998	1.352892767	1.241917097	6.535848211	0.082990241	2.20570211	1.122594587	2.127399308	2.310094824	0.931509967	4.731599247	3.059240661	0.665754677	2.762568745	0.627407394	0.378871031	2.209627311	0.625040276
157	0913BAC_0030_A1	0.000707592	0.000523527	0.004241366	0.008250897	0.058387821	0.01763529	0.008627079	0.031157463	0.035986676	0.029970872	0.00288811	0.008465566	0.007552652	0.028188763	0.01591171	0.049001795	0.00953858	0.102956578	2.604258327	0.016398997	9.027622952	0.220969057	1.041254784	38.74517173	0.211850028	0.185329503	1.333867696	1.702882629	8.204333208	0.353368342	2.585457167	0.832748965	2.241646143	2.163700659	1.086343044	2.911634033	3.436709355	0.290527326	4.916969427	0.892657239	0.451504705	2.931312636	0.682666605
158	0913BAC_0030_A2	0.000323563	0.000829696	0.003772701	0.008084263	0.057105138	0.012643793	0.009029553	0.022551317	0.037359229	0.028954169	0.001797177	0.007228389	0.00534821	0.027312826	0.018496775	0.048686874	0.011756786	0.096609939	2.621797746	0.015019165	8.964360725	0.214806008	1.137860582	38.24618632	0.211493363	0.175434751	1.401421985	1.61918969	8.146944647	0.359757696	2.522119268	0.860213155	2.177711191	2.253651138	1.15319628	2.826679077	3.388599469	0.285445205	5.055755431	0.873576932	0.438200083	2.820585495	0.679906373
159	0913BAC_0073_B1	0.0008207	0.000781961	0.002628853	0.005956998	0.097293545	0.062205462	0.006377437	0.05571842	0.032108813	0.02524405	0.005705391	0.007727663	0.005990006	0.034329004	0.022611607	0.05134303	0.010890589	0.104257516	3.636646955	0.020140901	8.582788318	0.531561182	1.450588043	33.0835842	0.203353816	0.147561924	1.279320466	1.469245954	10.90213287	0.191729775	1.972435389	1.26676647	2.011852847	3.256351855	1.289139641	2.942833429	3.501160919	0.731792834	3.912831478	0.902982508	0.426843311	3.285453949	0.683616905
160	0913BAC_0073_B2	0.000610712		0.001794212	0.004071432	0.105285615	0.04703331	0.010361068	0.041264924	0.023238786	0.027885694	0.004329441	0.007293214	0.006505978	0.036332771	0.023912844	0.04417655	0.010232372	0.097483657	3.262768261	0.021000472	7.888405296	0.542612421	1.433861327	35.02548911	0.212282866	0.139261715	1.425413007	1.382294316	10.92874302	0.208021935	1.850037427	1.204453224	2.012473537	3.162969207	1.277786198	2.876574141	3.535932072	0.729766208	3.957840083	0.876817975	0.45336811	3.415217156	0.670467082
161	0913BAC_01QC_G1	0.000807827	0.00109933	0.002516793	0.007773738	0.053838564	0.065991053	0.005843733	0.063348532	0.037778353	0.036402991	0.004794417	0.00964684	0.00667395	0.034200305	0.021173023	0.043705266	0.009643314	0.097477966	2.246008714	0.023674295	8.702328531	0.249857362	0.945987411	40.97731168	0.186579991	0.25584417	1.192456645	1.420964323	8.749113727	0.147890406	2.049034014	1.12423572	1.852759089	1.904904916	1.077078041	3.075183153	2.985935004	0.524413699	2.98632079	0.807869892	0.390466346	2.800249398	0.619241585
164	0913BAC_0051_A1	0.000730155		0.005123025	0.009379369	0.071808882	0.425891061	0.010344827	0.0406729	0.055917433	0.031828934	0.002713897	0.007088174	0.008741631	0.031479285	0.022251765	0.039385104	0.01408401	0.192265685	2.72599212	0.027822586	8.652018413	0.371732977	1.205963206	37.73970319	0.202823124	0.283573187	1.247697462	1.613538434	9.319827264	0.148558536	2.129738202	1.155260846	3.036951382	2.433437511	1.177073982	3.413792386	3.10386138	0.153690488	3.134543648	0.93185503	0.575573046	3.323255536	0.744232526
165	0913BAC_0051_A2	0.00074209		0.00403228	0.006625398	0.072471923	0.516255998	0.007628128	0.037124359	0.057729486	0.026849138	0.002424228	0.00603722	0.008588217	0.027126802	0.018461281	0.053184097	0.013295625	0.183147321	2.727623086	0.032368501	8.271017151	0.380666145	1.401056426	38.30855131	0.1945978	0.257411028	1.299870819	1.50419337	9.02622939	0.148112905	2.262210163	1.198229076	3.038808361	2.597835029	1.1643575	3.379385424	3.272809604	0.157681337	3.069195404	0.932393029	0.580429383	3.241475919	0.725828831
166	0913BAC_0050_B1	0.000568151	0.000921238	0.002879271	0.012046386	0.051737031	0.006194953	0.006884006	0.046949523	0.062861846	0.026759444	0.002206308	0.006927636	0.009267426	0.054556549	0.015685839	0.052276619	0.00946607	0.145211973	2.582892453	0.023267802	9.60309708	0.247695756	0.799749617	50.14084633	0.142021862	0.382796699	1.204496662	1.134454313	7.938949941	0.100254158	2.117082426	1.455459549	1.668406618	1.755000725	1.075029546	3.273905737	2.953896494	0.351866215	3.457584934	0.764381894	0.419379772	2.657049246	0.653672204
167	0913BAC_0050_B2	0.000598725	0.000750484	0.00430951	0.015122923	0.054228458	0.015584657	0.007821157	0.045520166	0.040077495	0.026541542	0.001544738	0.006196812	0.006471448	0.056257596	0.014143172	0.056158458	0.008206587	0.117772007	2.02196341	0.023855152	8.111820155	0.241428773	0.927819227	44.62354693	0.140676699	0.369617458	1.196227382	1.229452189	8.196151954	0.098420783	2.150581532	1.303210583	1.65516726	1.695457426	1.032757104	3.18902075	2.824567827	0.340072556	3.476250852	0.750613782	0.403343218	2.619040444	0.64563267
168	0913BAC_0070_A1	0.000698526	0.001484682	0.001348738	0.007418134	0.044371265	0.009352753	0.005870838	0.048941531	0.036642268	0.02598037	0.004121939	0.007973295	0.007677691	0.02490822	0.02249043	0.046666083	0.011985851	0.116661243	2.344431797	0.027726906	8.872547999	0.30799324	1.419107706	34.05717937	0.181028951	0.27269936	0.822650893	1.170219704	7.548421516	0.069112549	1.908118917	0.834555204	1.476011707	2.050362883	0.988985503	2.120386414	1.640701803	0.8979609	2.293025677	1.259156291	0.523769904	2.745307201	0.563567489
169	0913BAC_0070_A2	0.000866077	0.001423048	0.001576799	0.012267561	0.045548007	0.020980776	0.006314878	0.047637533	0.026826743	0.024128202	0.004135882	0.008824054	0.007836805	0.025856814	0.023904606	0.050111248	0.012339697	0.128178792	2.343569737	0.024308348	9.510530141	0.2982524	1.32793614	36.95074656	0.169293702	0.26044458	0.85902926	1.273704643	7.274509221	0.07297991	1.869122657	0.865618296	1.477812823	2.119711338	1.016665808	1.987548365	1.603844989	0.888872847	2.189389591	1.212341255	0.541406208	2.700343946	0.54953188
170	0913BAC_0072_A1	0.00065682	0.000887187	0.001336204	0.006482072	0.11139229	0.053402879	0.008776182	0.029785647	0.025148294	0.024613758	0.006491909	0.006030906	0.007153274	0.027200161	0.013797965	0.049530525	0.007552734	0.121402437	2.130401627	0.028552683	8.004088844	0.219541919	0.810583162	37.97683191	0.148882309	0.236240014	0.852907403	1.347079548	7.153052283	0.083056229	1.594481093	0.987686617	1.491135111	1.662436267	0.890945767	1.92337842	1.779720471	0.339454093	2.446416882	0.976551651	0.447236837	2.190194443	0.486246955
171	0913BAC_0072_A2	0.000712059	0.001386198	0.001041096	0.007767673	0.118576459	0.038518938	0.007791251	0.025723655	0.042774566	0.024618888	0.007105644	0.0063026	0.00722862	0.032552378	0.010789873	0.053120764	0.008003552	0.106928893	1.847590215	0.024486309	7.828782728	0.199007556	0.787213844	42.24688198	0.163321696	0.248433772	0.959486963	1.432766673	7.461611228	0.084439689	1.637596831	0.930218365	1.526627775	1.611332494	0.839899284	1.957314737	1.815281498	0.328478598	2.464475155	0.984086834	0.46798478	2.252332643	0.517988289
172	0913BAC_0071_A1	0.000629723	0.000495494	0.001634648	0.006860301	0.109641607	0.062351135	0.010375027	0.037795688	0.035917658	0.017533153	0.008910495	0.007002222	0.006439218	0.033909184	0.010999194	0.046278542	0.005903803	0.109293871	1.701193742	0.033618526	6.572206994	0.211547319	0.856221102	35.77977173	0.153884554	0.235182756	1.10065042	1.277670464	6.239342989	0.086612433	1.525914846	0.924812425	1.583422028	1.687424499	0.930962838	2.145670428	1.857864062	0.51769735	2.627552076	0.957043355	0.500193697	2.176137707	0.53732542
173	0913BAC_0071_A2	0.000679375	0.001558421	0.001010421	0.005978192	0.101725829	0.061448956	0.009143785	0.03945274	0.028166778	0.026771976	0.007463774	0.006912249	0.006780249	0.035055004	0.012836868	0.056380872	0.006680639	0.100950738	1.717649745	0.035195025	7.337396717	0.225126038	0.834712579	35.12728941	0.154475625	0.219540679	1.107903759	1.484675092	6.435708819	0.083413417	1.556367625	1.022343797	1.635239191	1.662860048	0.913867223	2.152349712	1.842113902	0.504737823	2.744793266	0.962256249	0.530295399	2.144863727	0.534319176
174	0913BAC_0069_A1	0.000592402	0.001374647	0.001963645	0.007371853	0.050612565	0.023690077	0.008780544	0.054645106	0.042422852	0.026052339	0.007011919	0.009263917	0.008696374	0.031357972	0.024103258	0.054415275	0.011891379	0.121319236	2.591500309	0.0315154	9.3308457	0.360611286	1.405481983	39.23848161	0.193480846	0.240890612	1.139255297	1.439098205	7.251091639	0.090100659	2.328291009	1.013316465	2.010164723	2.293809701	1.221286838	2.516551065	2.2059734	0.760984966	2.605415227	1.337156698	0.667924002	2.809873434	0.661985805
175	0913BAC_0069_A2	0.000502185	0.001900924	0.001417336	0.00638053	0.048594815	0.014688944	0.007606983	0.050995957	0.032898746	0.026002742	0.006869907	0.009948162	0.007751177	0.031242307	0.026191141	0.05351262	0.010996613	0.150210159	2.366186504	0.034527287	9.291113941	0.339329371	1.302224081	39.93321421	0.205432527	0.240241999	1.23784582	1.467392692	6.810266073	0.082595691	2.309266052	0.963736091	1.91880915	2.260365106	1.236324104	2.327348089	2.253301769	0.74748184	2.544748716	1.334216009	0.620333593	2.910295332	0.652120046
176	0913BAC_01QC_G3	0.000588727	0.001513954	0.003006398	0.008067136	0.058699494	0.081264236	0.004694767	0.051008948	0.032745346	0.033011367	0.004299266	0.009891895	0.010146459	0.037810799	0.016907644	0.051745006	0.009975131	0.090685939	2.042597346	0.023996679	9.230234285	0.249234847	1.104413189	40.20132513	0.191189019	0.257365119	1.156312643	1.453553698	9.193628277	0.138488631	2.04900097	1.105702678	1.839278512	1.817892152	1.113123363	2.954311839	2.937360697	0.505379023	3.084457765	0.847407912	0.405460781	2.860448051	0.636666022
179	0913BAC_0025_A1	0.000728052	0.001604559	0.003929226	0.014607666	0.065235586	0.052081803	0.013666033	0.023489667	0.043491144	0.02814306	0.003915686	0.00731329	0.010886028	0.026990289	0.027564362	0.044842616	0.012221626	0.253545254	1.820263292	0.014915554	9.195263064	0.170149881	0.823891133	44.74421038	0.146219155	0.491062543	0.984365768	1.657347022	7.706420209	0.153172621	1.790831787	1.48096024	1.61239129	1.307665568	1.233086686	2.535195047	3.125691686	0.321176403	2.997096417	0.758233569	0.254407844	2.989365449	0.539033501
180	0913BAC_0025_A2	0.000434411	0.001613731	0.004042872	0.010784579	0.066120627	0.05965477	0.007615833	0.026485631	0.038962283	0.026250212	0.003849621	0.006788149	0.011119701	0.030041779	0.025269317	0.049374511	0.011903743	0.239765904	1.666896966	0.014901487	9.871986887	0.171957546	0.702131641	45.37316386	0.142966823	0.491013712	1.154142779	1.54859919	7.871819078	0.134294498	1.83251884	1.490241767	1.673356635	1.29484123	1.134234633	2.249339858	3.076264223	0.306743524	2.952273901	0.775806392	0.252966642	3.16879003	0.557852009
181	0913BAC_0022_A1	0.000652693	0.001499076	0.004280499	0.01338942	0.068606473	0.111060729	0.012618254	0.049500403	0.023593753	0.059697713	0.002358345	0.006304232	0.00792108	0.096425343	0.026497999	0.04303311	0.01282308	0.14424895	2.274156888	0.012054712	11.89653123	0.378415441	1.072182304	44.48948752	0.18749673	0.292906664	1.643675155	1.879082215	9.852376238	0.16435884	2.589042366	1.892314636	1.902876134	2.271928578	1.935585868	2.241299539	4.627574501	0.276503041	2.965640442	1.08809786	0.332197736	4.473251631	0.67166232
182	0913BAC_0022_A2	0.000679387	0.000921335	0.006474225	0.011854124	0.067976875	0.123719644	0.011472658	0.045906955	0.03595774	0.059592061	0.001722681	0.006180361	0.009766356	0.089539462	0.030814999	0.050786662	0.013188789	0.154737225	2.447012179	0.011933693	12.19220349	0.363734037	1.065784289	42.57922612	0.18858564	0.29022675	1.554028628	1.894412539	10.2122293	0.177848688	2.668553041	1.847226849	1.885246116	2.215644481	1.900627739	2.241373136	4.49443968	0.284257186	2.916792604	1.098182529	0.320747166	4.487198576	0.669835243
183	0913BAC_0023_A1	0.000844715	0.00149698	0.003551892	0.01144274	0.057449373	0.104956427	0.010183929	0.047977158	0.026013181	0.031923148	0.001065517	0.010386919	0.007837935	0.061929015	0.036091259	0.05188764	0.012916384	0.112343609	1.825866331	0.009181752	9.007977043	0.248547113	0.85302703	34.57034963	0.165469305	0.246395985	1.3671483	1.362772899	9.804803248	0.111798782	2.284533046	1.559523522	1.54512933	1.963481383	1.589152482	1.766769828	3.932293456	0.544526901	2.067129577	0.943144168	0.231001394	4.031905847	0.519526401
184	0913BAC_0023_A2	0.000883877	0.000952812	0.004288181	0.010467165	0.055402233	0.08122287	0.011320408	0.055286264	0.021259566	0.031874537	0.000956339	0.009396865	0.010495514	0.06852672	0.032373346	0.057737741	0.011873852	0.114621391	1.678327787	0.011561311	10.81631079	0.245402787	0.82969928	31.68479637	0.158357956	0.241572114	1.453275582	1.42413487	9.475680013	0.103570866	2.296470689	1.534556238	1.530707365	1.935679978	1.560034468	1.793240014	3.877434899	0.531041288	2.118755048	0.916410229	0.238532088	3.998879258	0.523652018
185	0913BAC_0024_A1	0.000634042	0.001208318	0.003493704	0.018756783	0.059029392	0.062951769	0.010555323	0.045582401	0.05350402	0.027870516	0.004803618	0.008462346	0.008479145	0.027423363	0.025039693	0.040946353	0.012504359	0.290855957	1.942987096	0.020793453	10.20332397	0.21480905	0.892177957	44.51372952	0.17045754	0.518753334	1.560718608	1.858346693	6.776990203	0.164986163	2.004963907	1.707285841	1.791428383	1.747340385	1.321821337	2.780590693	3.27866884	0.856669264	3.250411868	0.968269924	0.311290029	3.132973999	0.615493948
186	0913BAC_0024_A2	0.000598989	0.000974748	0.003245915	0.019586218	0.061768575	0.06618343	0.013961909	0.058453368	0.038827249	0.029918742	0.004690297	0.008804886	0.011536686	0.026359349	0.027192793	0.045386453	0.014072217	0.244293524	2.230526195	0.017910871	10.52314423	0.211334115	0.765021146	44.25987778	0.15638984	0.524480652	1.467604749	1.834488748	6.931552433	0.166986133	2.086102718	1.763642592	1.762837958	1.71138545	1.410255221	2.998701813	3.286844747	0.82122989	3.32275954	0.96971652	0.322399919	3.224381812	0.591942387
187	0913BAC_0043_A1	0.000667107	0.000869212	0.005227563	0.020044457	0.070820073	0.032586581	0.011244376	0.047770449	0.031826497	0.029772011	0.005017237	0.006849284	0.009483941	0.050372171	0.014304249	0.0586565	0.00962044	0.10407017	2.737165785	0.028083621	8.491934802	0.491208265	1.230059732	41.72297288	0.185160439	0.170377217	1.415557791	1.543018361	11.28062309	0.129089856	2.410981011	1.009979115	2.246360503	2.121070123	1.203660621	2.95053463	3.898326345	0.474927447	4.500840849	0.900379677	0.491948386	3.338559516	0.697999149
188	0913BAC_0043_A2	0.000938132	0.000892848	0.003055772	0.01427383	0.067258004	0.031052188	0.009225753	0.040324837	0.056527918	0.028760443	0.003974746	0.005705324	0.007503694	0.04775567	0.020176928	0.043720504	0.009253663	0.120121288	2.738503897	0.027176199	8.363757405	0.490383582	1.099672157	40.75988062	0.200155537	0.174491169	1.495076088	1.40588396	11.73688261	0.142330286	2.368706948	1.03561465	2.290591031	2.015974777	1.282368006	2.770048557	3.939105143	0.47182772	4.415052215	0.859563396	0.479031279	3.100842121	0.704619354
189	0913BAC_0045_A1	0.000604541	0.001273214	0.003935428	0.018340557	0.068246309	0.032954913	0.012528384	0.04093214	0.030848603	0.023819432	0.003287747	0.007071595	0.009925434	0.045315155	0.010395267	0.051871462	0.01069121	0.123338645	2.89105062	0.064744891	8.116299603	0.366036199	0.972764739	44.41985615	0.153878992	0.295596102	1.204783361	1.457630904	7.126305085	0.127853605	1.70112659	0.984758153	2.275902495	1.469904751	0.801265266	3.31941118	3.281620524	0.428612299	4.597021194	0.665829794	0.535890145	1.940629221	0.617454645
190	0913BAC_0045_A2	0.000651226	0.000827322	0.003584904	0.018097029	0.067690301	0.040282055	0.009431328	0.047760516	0.041658979	0.022602837	0.004743333	0.007546886	0.010237384	0.042353603	0.00838809	0.046127809	0.010470858	0.112311103	2.633509636	0.060795857	8.141165783	0.356094243	0.888993705	49.12263575	0.167341433	0.287432416	1.18995592	1.504016466	6.744264547	0.124157017	1.528569844	0.990575365	2.256351027	1.512681492	0.797935102	3.454542204	3.27744999	0.421817444	4.887572074	0.666841921	0.536605897	1.860387518	0.61898718
191	0913BAC_01QC_H1	0.000492717		0.003267249	0.008028129	0.096490595	0.077354046	0.005191972	0.033120864	0.039124505	0.037356227	0.005271428	0.008073975	0.009422774	0.038749739	0.024216829	0.057404033	0.011736603	0.091819446	2.599486734	0.024010889	8.377051524	0.25797068	1.00082099	38.67510717	0.18058992	0.257823474	1.171149273	1.422280146	8.847914419	0.134900448	2.16751636	1.146537461	1.802737237	1.934618376	1.102653978	2.63083302	3.053695353	0.508431221	3.191736712	0.84468501	0.38664013	2.821603874	0.613264617
194	0913BAC_0044_A1	0.000609052		0.005629788	0.012780138	0.0690907	0.02772507	0.007528716	0.030046906	0.03336309	0.032744078	0.007126387	0.006417702	0.006800669	0.052679147	0.015345134	0.055073955	0.009415178	0.097581358	2.63046629	0.023529717	10.05946826	0.505363572	1.498518834	41.42492631	0.217616362	0.185704552	1.47376505	1.418285723	12.02945907	0.106987977	2.280748919	1.106930657	2.096935619	1.760045917	1.246445724	2.790412226	3.629259688	0.375516743	4.091999151	0.957556554	0.408276408	3.372578501	0.702368662
195	0913BAC_0044_A2	0.000606284	0.000761138	0.004260328	0.013556131	0.070827991	0.036466394	0.006445284	0.03713381	0.02585213	0.042402166	0.007081099	0.007053124	0.006088528	0.057654941	0.01505823	0.0554058	0.011272893	0.113209671	2.720106171	0.022584551	10.50122808	0.488198362	1.302505604	44.92317298	0.205357609	0.175975509	1.550093473	1.531726377	12.45395903	0.115977112	2.378433064	1.103602732	2.070870121	1.74142098	1.170941208	2.604513984	3.680363455	0.362591514	3.897980532	0.989520044	0.395362662	3.580869516	0.686153591
196	0913BAC_0046_A1	0.000798575	0.000802943	0.003446763	0.013048102	0.072643238	0.031384545	0.010687141	0.034224396	0.038319697	0.026852207	0.002220164	0.005512273	0.008204246	0.044008522	0.011777004	0.054017402	0.009040142	0.088324534	2.36480569	0.043161847	7.927814983	0.330065124	1.054082448	52.68984768	0.156455708	0.320845956	1.266263038	1.305129389	8.237629552	0.123194426	1.866979179	0.957842491	2.393542714	1.234484894	0.739231892	3.686350977	2.765243004	0.552122077	4.304398073	0.675006772	0.459096565	2.166527165	0.651875431
197	0913BAC_0046_A2	0.000553918	0.001729185	0.003027945	0.012645801	0.074035365	0.033052934	0.009541557	0.041850621	0.04840169	0.024851642	0.001721634	0.006474597	0.011443792	0.047055896	0.011409922	0.047554173	0.008251685	0.110768972	2.491355832	0.038494717	8.566741757	0.339016049	1.167548697	46.77770145	0.172868689	0.311896764	1.177854625	1.548244941	7.694892006	0.135206301	1.820774443	1.011787512	2.42314939	1.240458895	0.778353169	3.781773786	2.675186694	0.560266031	3.99513485	0.63876121	0.472131698	2.038583515	0.645026721
198	0913BAC_0027_A1	0.00089579	0.000278712	0.004041333	0.01413195	0.086249089	0.149347717	0.010793627	0.034798421	0.055436212	0.035944367	0.003475482	0.007377578	0.00981183	0.043675364	0.021357472	0.054940207	0.014878768	0.175770656	2.290710726	0.039230784	8.443988966	0.256791955	1.330918284	36.86693269	0.234848963	0.253277848	1.530818906	1.747396169	8.377731849	0.175456516	2.466977303	1.216968956	2.257909963	1.874432122	1.326284893	3.52938409	2.85873267	0.151779742	3.508808116	1.092680312	0.445468591	3.534172973	0.779818608
199	0913BAC_0027_A2	0.000960622	0.001017633	0.003553316	0.014873411	0.086409644	0.172685366	0.005998569	0.036801943	0.052816746	0.037684059	0.003389173	0.005903865	0.009114599	0.047336286	0.029209001	0.048596968	0.017419054	0.152690932	2.337632941	0.039054008	8.472649065	0.274123267	1.218152556	37.02921844	0.205920999	0.246510906	1.366265911	1.868005327	7.847056462	0.155825584	2.37695248	1.24622935	2.371821307	1.973086094	1.357363333	3.722912346	2.911724186	0.151479804	3.389895784	1.074648272	0.430276171	3.627959548	0.74343968
200	0913BAC_0062_B1	0.000608774	0.000752253	0.002173383	0.011326163	0.05014342	0.046506351	0.013404105	0.045938125	0.050258798	0.028948331	0.004050082	0.005475859	0.006406622	0.029780443	0.008901886	0.046472189	0.006642953	0.116345196	2.863590997	0.017244039	6.375509738	0.381502598	0.969027666	43.69351175	0.180144797	0.18619019	1.141906127	1.67946302	8.391895576	0.10900576	1.766656844	0.821721818	1.351537356	1.300651172	0.808752649	2.769938837	3.094943895	0.355417276	3.222821256	0.80523948	0.527266327	2.10116518	0.551129293
201	0913BAC_0062_B2	0.000692936	0.000744407	0.003976899	0.015180882	0.051852812	0.032884993	0.016165129	0.046593326	0.034612794	0.031022306	0.001479609	0.0062952	0.008253225	0.026592151	0.014170325	0.046869837	0.007008057	0.137632669	2.828437473	0.01447685	6.809075762	0.373199687	1.002850464	42.23903226	0.187597198	0.193447432	1.174020516	1.711608552	8.174859899	0.101347228	1.718632874	0.874246076	1.320462805	1.267302035	0.830257686	2.842077836	3.079980858	0.361891308	3.268395215	0.803412763	0.508387439	2.048005854	0.534786795
202	0913BAC_0033_A1	0.000672901	0.000692177	0.003166564	0.015778518	0.06638224	0.024252646	0.01084695	0.029653061	0.04605121	0.026947517	0.003527009	0.007401861	0.006628474	0.033806385	0.014346653	0.046985912	0.006612898	0.11159511	2.228662241	0.018434365	7.608683948	0.233721817	0.779252291	38.57781047	0.187014284	0.223011225	1.303399778	1.647729734	8.429404516	0.127947892	1.842343575	1.141901267	1.816758633	1.835009656	1.172577235	3.325543176	3.438781649	0.254229659	3.210933513	0.765305835	0.444099247	2.62485298	0.674517609
203	0913BAC_0033_A2	0.000934001		0.003393745	0.010431351	0.067979053	0.014797717	0.012315933	0.02712145	0.047211581	0.026689394	0.003398651	0.007309659	0.007747213	0.03360504	0.008874623	0.051869388	0.006992565	0.117520769	2.162891001	0.017965655	8.360742798	0.226541752	0.721556685	41.51763758	0.184051301	0.225793719	1.293493779	1.630174613	8.206440578	0.133104791	1.802618977	1.161235175	1.776593804	1.843516989	1.154815221	3.139085679	3.53723203	0.257122765	3.18122384	0.794762697	0.441699748	2.693774125	0.663008149
204	0913BAC_0032_A1	0.000654532		0.002364233	0.010037708	0.062243332	0.022265728	0.00796636	0.038963766	0.041595306	0.042102513	0.002892969	0.005604537	0.006459797	0.037981282	0.022542446	0.05108898	0.007466892	0.090975071	2.273636315	0.009934043	10.88239974	0.323229399	0.996237638	37.61907717	0.181560052	0.212360395	1.704212004	1.352753672	14.12226668	0.250202315	2.662750142	1.512878906	1.978974671	2.321424529	1.478781866	2.601405951	4.166495618	0.37053781	2.609507225	1.060218629	0.187711002	3.90207137	0.73397318
205	0913BAC_0032_A2	0.000515532		0.004038384	0.014101068	0.061886855	0.019823748	0.005357606	0.039850805	0.029332209	0.038802329	0.003232712	0.005741489	0.007349813	0.035064457	0.017920428	0.041514651	0.008759924	0.079587205	2.487864066	0.010558404	10.0702994	0.311917317	0.969850736	38.58381843	0.204511185	0.199529397	1.668285223	1.318901795	13.8666178	0.247290527	2.552421551	1.473397674	1.998918178	2.362251903	1.496002328	2.898951702	4.215744492	0.402450961	2.576390622	1.038670084	0.196962354	4.031400053	0.772567745
206	0913BAC_01QC_H3	0.000579645	0.000443255	0.003596108	0.011161428	0.096680625	0.068922815	0.005564961	0.045072596	0.045215099	0.042472928	0.004382225	0.008398487	0.00897943	0.036462705	0.021041462	0.047941123	0.010840279	0.086064008	2.333210253	0.024690503	8.846464934	0.254856086	0.947238539	42.86864538	0.193935189	0.261512654	1.184433506	1.384243989	8.605453981	0.139577867	2.043218237	1.115181362	1.853072801	1.885859864	1.090262157	2.789407892	2.948159214	0.504512963	3.195684382	0.835146306	0.40499046	2.688498486	0.60589927
209	0913BAC_0034_A1	0.000754908	0.000724462	0.00241981	0.01794114	0.069416136	0.014976761	0.005724519	0.032727827	0.031569371	0.027174801	0.002158996	0.006304407	0.006892664	0.02573484	0.014457365	0.05107644	0.006297168	0.107835545	1.617455368	0.012405189	6.838554511	0.197367843	0.774939994	40.25715255	0.173897129	0.221668552	0.83407283	1.338901773	8.190245387	0.1181304	1.755778898	0.847635902	1.573677074	1.322338212	0.763481635	2.955818561	2.850606423	0.321191533	2.709161576	0.497184612	0.300383895	2.257364334	0.541659736
210	0913BAC_0034_A2	0.000841263	0.000390368	0.004007674	0.013141193	0.068741068	0.006437444	0.005731186	0.028351811	0.021431003	0.025979086	0.004001873	0.007429096	0.007333479	0.033169742	0.011255468	0.051796257	0.006247214	0.102989288	1.911246448	0.014209069	6.889233403	0.190928161	0.717946113	40.77320933	0.170713876	0.218971342	0.845157478	1.245278624	8.623796199	0.128258135	1.761219339	0.838237307	1.625557196	1.20940428	0.727886204	2.955598026	2.808652024	0.330794891	2.591643772	0.482737332	0.312908014	2.386692047	0.522649407
211	0913BAC_0031_A1	0.00089582	0.00016226	0.004205274	0.014475982	0.061915247	0.021906894	0.006907249	0.059064911	0.042687645	0.023556814	0.001442681	0.006094414	0.01055315	0.03688144	0.023504688	0.044166435	0.00803212	0.09881701	2.176795632	0.014941812	8.685590941	0.32217521	0.972562076	32.95357052	0.199545575	0.187468951	1.445876078	1.545269695	12.73382777	0.312218378	2.574902852	1.362714216	2.182251976	2.265676319	1.488922755	3.068811272	4.296908155	0.640922741	3.140912894	0.929350199	0.315641504	3.862892916	0.797461681
212	0913BAC_0031_A2	0.000743903		0.003308282	0.010427806	0.06516629	0.027237976	0.007044888	0.046360368	0.024384018	0.023096171	0.001769843	0.005700406	0.007424191	0.037287866	0.02115475	0.040831611	0.008271927	0.121042945	1.915781935	0.012530412	9.294091612	0.318582213	0.967919776	35.40593259	0.206068223	0.197698738	1.429174096	1.371006572	12.22128396	0.359173741	2.398621884	1.367962905	2.183206854	2.243811633	1.487340801	3.167967371	4.134613236	0.655533965	2.915277228	0.880200137	0.324019248	4.086231138	0.827317516
213	0913BAC_0042_A1	0.000671809	0.000916225	0.002023151	0.01226902	0.07706658	0.020200492	0.006830047	0.044089447	0.045681748	0.038200703	0.003178559	0.009324852	0.008378282	0.031746798	0.029787675	0.047344344	0.010247373	0.090420219	1.485169794	0.040555097	7.562692625	0.15702265	0.876779749	40.59431628	0.160850014	0.55070291	1.122884616	1.565780623	8.78085155	0.146542849	2.361538335	2.014057924	1.607842629	1.674024143	1.48153242	2.693570134	2.312443645	0.259668814	3.077094042	0.692759924	0.387832579	3.149233788	0.609971744
214	0913BAC_0042_A2	0.00079818	0.000908534	0.001576524	0.012512494	0.080799904	0.009553305	0.008599642	0.038844073	0.025433058	0.039082629	0.003757078	0.00870239	0.011805645	0.041142858	0.028593858	0.05095308	0.010452744	0.091108994	1.634526747	0.042537944	7.854339957	0.167203087	0.904279706	40.42896047	0.173686638	0.554727575	1.169806102	1.546119749	8.098199663	0.145671498	2.341438387	2.130312927	1.674661592	1.760431586	1.442668203	2.515209873	2.342361739	0.245842566	3.221200121	0.698915838	0.399543678	3.244072127	0.621892951
215	0913BAC_0040_A1	0.000724569	0.000695197	0.00490365	0.012817465	0.064110937	0.024760049	0.008274612	0.040491305	0.033914082	0.035437434	0.003998914	0.006639045	0.006150118	0.043426394	0.038064754	0.055042623	0.016222366	0.094535101	2.724997948	0.012802712	10.04508059	0.283771704	1.210843609	37.6821952	0.19671861	0.314106675	1.477859373	1.709291647	9.504410497	0.164669973	3.303845527	1.516516268	2.036847572	2.826840198	1.561997664	2.492753275	4.079122188	0.39452309	2.712992105	1.095034033	0.286289405	3.921804381	0.644163463
216	0913BAC_0040_A2	0.000730051		0.005492218	0.008592383	0.064202606	0.027337117	0.007973618	0.043880721	0.037287493	0.039625264	0.003887846	0.006055527	0.009149457	0.042846102	0.026741327	0.04660585	0.013313838	0.085026263	2.76361772	0.015911143	9.99687387	0.283724176	1.160731127	40.88682864	0.195624656	0.312413804	1.542361581	1.625515028	9.229209013	0.163155411	3.328561218	1.51920233	2.094284192	3.047006641	1.558404604	2.550000499	4.205559252	0.398336133	2.826510862	1.088594781	0.291630805	3.987712382	0.6834263
217	0913BAC_0039_A1	0.00074946	0.001124658	0.003900111	0.007593696	0.060334933	0.029563109	0.010392084	0.055740601	0.036374103	0.026189563	0.005312068	0.008960464	0.008160614	0.03506868	0.0321383	0.049695404	0.013313464	0.102800851	2.21979503	0.016449393	8.363886062	0.234416552	1.186611571	30.88871582	0.168287411	0.265659244	1.382549873	1.393619025	6.974422055	0.193223738	2.743402677	1.381672495	1.927005111	2.691694046	1.492397655	2.661482332	3.012070489	0.424488133	2.677013323	0.966575801	0.351729646	3.44453313	0.586474935
218	0913BAC_0039_A2	0.000507333		0.003045257	0.006679382	0.058486025	0.01818818	0.007955072	0.046330037	0.029189137	0.031920715	0.005117506	0.009046611	0.006766868	0.038521955	0.033615776	0.047992542	0.013711269	0.124741441	2.224371943	0.013947921	8.093255054	0.228721935	1.278226872	30.02555793	0.177805332	0.258960202	1.284157276	1.433418519	7.360248284	0.185413816	2.701574751	1.30750596	1.92691637	2.748970748	1.474875211	2.570272922	3.107098519	0.422835391	2.628706188	0.896933844	0.331139688	3.396539432	0.558964549
219	0913BAC_0041_A1	0.000609062	0.001078338	0.001297104	0.014045011	0.077107891	0.015104952	0.011507917	0.068841344	0.055390591	0.033223377	0.005218043	0.007267126	0.007571579	0.039132783	0.031224812	0.045975532	0.014691459	0.110550635	2.078192727	0.052433635	10.75368747	0.207982574	0.948908989	47.43730235	0.187814431	0.577073888	1.656188777	1.79766662	7.920088333	0.168479703	2.425301563	2.233099141	1.832122699	2.429432167	1.683821909	3.135402447	3.024685909	0.507181086	3.705365676	0.893176308	0.462656546	3.338555037	0.770775846
220	0913BAC_0041_A2	0.000600288	0.000721763	0.00203623	0.013845392	0.075398957	0.032994536	0.011519044	0.053276047	0.049077209	0.038454043	0.004255884	0.008558139	0.007829225	0.039379582	0.02269723	0.050696411	0.009901221	0.114632817	2.217045482	0.050562026	10.05303789	0.214553301	0.883839768	46.31804765	0.193263099	0.588468305	1.69536228	1.80504971	7.637937727	0.169150671	2.340050188	2.139922422	1.861706539	2.484186761	1.670006775	3.1056515	2.940986875	0.496028584	3.809821727	0.870971158	0.452660013	3.310107476	0.740634538
221	0913BAC_01QC_J1	0.001012445	0.001039858	0.003609405	0.008674817	0.082060996	0.069031323	0.006162166	0.047546866	0.036561043	0.03179652	0.005732892	0.008773051	0.006858856	0.040242273	0.019041975	0.052919863	0.012290537	0.136978397	2.503240968	0.021473757	8.664221227	0.281614003	1.153307837	40.02338158	0.199090648	0.283391919	1.264620569	1.756966817	9.780601836	0.164222717	2.189837861	1.212553979	1.978217922	2.090082093	1.167987133	2.962858831	3.225673011	0.545432613	3.497052273	0.931094638	0.431655408	3.155556591	0.650631638
224	0913BAC_0007_A1	0.000691873	0.00051192	0.005004759	0.015220866	0.123392606	0.066469199	0.005283039	0.032898126	0.050083966	0.027353146	0.003493909	0.005067561	0.008312517	0.023762497	0.01447727	0.051031904	0.015851022	0.127795076	2.929330548	0.06689643	9.516843298	0.292463186	1.346338404	37.68291155	0.218776089	0.258242667	1.479403367	1.679824706	10.64166752	0.224108076	3.135537816	1.206148501	2.408638262	2.374210896	1.186718781	3.662898669	3.719671992	0.389693375	3.716641317	0.885857695	0.447986282	3.062895787	0.738642
225	0913BAC_0007_A2	0.000559726	0.000428688	0.00463674	0.016685488	0.125716407	0.081234745	0.005694427	0.035585878	0.038423593	0.027130969	0.00354975	0.005313855	0.009321936	0.027337289	0.013010562	0.049343646	0.015894001	0.113071797	2.866454822	0.064640352	9.629422271	0.302164107	1.419236547	41.64971329	0.217739142	0.265774838	1.554395593	1.736132864	10.19928926	0.215177654	3.185158921	1.200677808	2.408186013	2.572678632	1.084468167	3.620754814	3.699101257	0.376518567	3.731490436	0.915246854	0.44613173	3.056325653	0.718841226
226	0913BAC_0064_B1	0.000631128	0.002453415	0.001742649	0.011608222	0.101436751	0.369626417	0.010607669	0.052415127	0.034367775	0.029243862	0.003189704	0.008280763	0.006613443	0.01537145	0.021719	0.049793491	0.007975319	0.126762944	2.418449075	0.033542019	9.99630001	0.200960822	0.680423401	29.38234359	0.238892784	0.215421614	1.437277872	1.103814521	5.911949916	0.115479726	1.492670332	1.057781466	2.743512905	2.829871385	1.219341182	2.622965483	2.467282689	0.284073177	2.208404064	0.860877923	0.402482894	3.302280129	0.773632021
227	0913BAC_0064_B2	0.000913464	0.001689516	0.002564496	0.011537529	0.097788795	0.414594656	0.010973171	0.049594413	0.049841722	0.029352573	0.00293997	0.008313798	0.005995442	0.019698452	0.024932509	0.047917534	0.007405012	0.126649616	2.333195581	0.038698039	10.64285287	0.19413846	0.737127169	28.89395107	0.251936893	0.202773512	1.375251621	1.138041879	6.093405518	0.114925158	1.511951518	1.118382577	2.874974741	2.749345282	1.226958712	2.600392954	2.383621962	0.289072578	2.222374179	0.863443062	0.452911263	3.406780831	0.742239238
228	0913BAC_0029_A1	0.000874901		0.001864065	0.008897481	0.05702698	0.290268313	0.005494332	0.038570477	0.039418881	0.024665556	0.00316555	0.006775704	0.007461271	0.026284488	0.012733386	0.053143564	0.012800608	0.106105148	2.382431263	0.019814466	8.152392339	0.307278685	1.214793943	40.0678901	0.1863944	0.176115316	1.239572313	1.23107379	8.043591076	0.099920038	2.415617524	1.000542758	1.931813969	2.350217894	1.06634542	2.869444246	2.14221472	0.373814559	4.051594723	0.972392608	0.348956398	3.023475078	0.712860414
229	0913BAC_0029_A2	0.000883787	0.000289984	0.002639061	0.005217039	0.059646039	0.29285562	0.00637216	0.036029523	0.042134593	0.031848002	0.002405823	0.006996033	0.007022687	0.031525343	0.013783974	0.056211315	0.014282843	0.103244434	2.720458483	0.019363885	7.927007259	0.312218955	1.159608947	37.64017857	0.197217247	0.174484029	1.132559387	1.177802345	7.947072077	0.098243457	2.467608122	0.979917024	1.967339437	2.436264969	1.057119153	2.724918464	2.163136147	0.369304763	4.032647781	0.93327417	0.348483002	2.899011488	0.691910525
230	0913BAC_0047_B1	0.000699085	0.001322331	0.003308383	0.006699631	0.051619869	0.158397799	0.007195175	0.034941764	0.045870501	0.024012787	0.00539527	0.00625972	0.00852071	0.066847601	0.027013929	0.048174155	0.00894359	0.111419977	3.199707591	0.034892881	10.96538909	0.32611167	1.57249264	39.91987923	0.211426085	0.498601547	1.403551118	1.368144515	7.459438092	0.197944282	2.185424465	1.439834494	2.298855644	2.551383583	1.627637302	3.137072207	3.589855179	0.367862826	2.944284155	1.055973235	0.436682388	4.617831079	0.782407471
231	0913BAC_0047_B2	0.000644692	0.001008987	0.003962673	0.007730445	0.05251703	0.137326385	0.007253117	0.032492923	0.06274831	0.021720145	0.007408836	0.005711891	0.006301788	0.067944727	0.032848447	0.041436206	0.009720917	0.128464394	2.8998421	0.035857599	11.26399552	0.313739947	1.461632838	41.3698907	0.210101823	0.481489696	1.407959239	1.433684434	7.648131392	0.181495038	2.122496389	1.418532657	2.29000789	2.513162923	1.669951062	3.274434408	3.556243036	0.375666097	2.940037229	1.093221079	0.47208464	4.450666674	0.812595466
232	0913BAC_0018_A1	0.000598511	0.001235486	0.004621041	0.011135281	0.051338344	0.018486947	0.0074254	0.045922856	0.029485322	0.030039674	0.011031977	0.006419384	0.009072516	0.0531598	0.033480961	0.051784547	0.007263307	0.103519965	1.578745255	0.010903559	10.52394345	0.247278163	0.750826444	33.88247594	0.189724164	0.303480849	1.447535114	1.619666998	8.899904827	0.123439487	2.523868192	1.309762467	1.528102444	2.089037908	1.56064824	1.959118309	3.807997511	0.68991447	2.248815968	1.018557071	0.32942883	3.796963152	0.633930076
233	0913BAC_0018_A2	0.000573132	0.002375276	0.004105772	0.012757304	0.053095831	0.014632597	0.010429436	0.055309743	0.030930566	0.03181792	0.011733462	0.006933788	0.006865812	0.042014159	0.028898058	0.044698817	0.007559769	0.119433589	1.902785133	0.010821442	9.660945377	0.240581421	0.8047302	31.61991884	0.19633246	0.314525794	1.370461846	1.548676484	8.80058434	0.136642865	2.46016018	1.235641174	1.553667609	1.965267449	1.597090248	2.1197833	3.857819962	0.701469847	2.293900026	1.003800982	0.33832782	3.751116198	0.662041899
234	0913BAC_0019_A1	0.000658104	0.001378163	0.004926309	0.012036506	0.049376855	0.021530167	0.011536767	0.05434145	0.021106286	0.045036722	0.00482901	0.00898468	0.007460597	0.060433482	0.038038736	0.04958824	0.009545765	0.116938534	1.692235856	0.01055424	10.86473179	0.278633546	0.870414244	31.33886633	0.188069485	0.354415225	1.658209213	1.385308079	11.68964199	0.102101797	2.798017909	1.71733451	1.448404445	2.845142366	1.827550611	1.910744238	3.974347332	0.918475896	1.911021289	1.095218588	0.347987362	4.12963506	0.635782322
235	0913BAC_0019_A2	0.000761807	0.001177402	0.00336119	0.013342418	0.049317665	0.019417844	0.008080332	0.044590167	0.032338908	0.045966393	0.004834319	0.009383072	0.009028484	0.055576193	0.028749812	0.051268532	0.008740114	0.117910708	1.771478436	0.011249816	11.16144462	0.276757671	0.942575742	30.41573638	0.190546569	0.334777415	1.611237823	1.452760732	11.7160414	0.091537481	2.776460339	1.739120186	1.442445365	2.844530386	1.857191231	1.833879779	4.021937544	0.921407478	1.965879377	1.146774759	0.358926102	4.184187848	0.622990896
236	0913BAC_01QC_J3	0.000733953	0.001060235	0.002975473	0.010904414	0.085161411	0.081470084	0.00512716	0.04449622	0.045015849	0.028318026	0.005209838	0.008303513	0.008412525	0.04095843	0.020550748	0.050045241	0.013150589	0.13958609	2.392774331	0.023936698	10.16118514	0.278756993	1.018358618	45.0260129	0.184040899	0.28391253	1.30908948	1.561429869	9.313664214	0.156826194	2.224760983	1.233235756	2.070606727	1.972116338	1.215413129	3.253188736	3.179422105	0.546564955	3.41739065	0.924053826	0.42209146	3.071497808	0.626284024
239	0913BAC_0020_A1	0.000896707		0.002342713	0.010219461	0.055156341	0.071953713	0.010007522	0.042830876	0.045839784	0.024518579	0.006854632	0.006825359	0.007615016	0.024530639	0.019564279	0.052806298	0.007962615	0.130264079	1.890372546	0.020866003	8.616011508	0.184379907	0.705216184	35.75073119	0.167903141	0.430986786	1.057076903	1.221591238	7.788175729	0.128885562	1.69046711	1.234400161	1.42381428	1.795033408	1.389996712	2.291718799	2.371098864	0.512619282	2.813504209	0.678101793	0.371768438	3.162766741	0.509306437
240	0913BAC_0020_A2	0.000729142	0.001245268	0.002766317	0.010760151	0.053746544	0.083716439	0.010140239	0.047363218	0.044868356	0.020401638	0.005490806	0.007018594	0.008880473	0.025598386	0.017680999	0.054406987	0.009039226	0.121314565	1.671459017	0.020595298	8.013957956	0.187045502	0.723716309	38.74958386	0.160635316	0.414759849	1.002832367	1.306184074	7.702342513	0.128015752	1.673082216	1.250145843	1.495831708	1.802087404	1.272633316	2.229913473	2.350800756	0.53014104	2.648139149	0.76364875	0.373135868	3.105792326	0.518940503
241	0913BAC_0021_A1	0.000726775	0.001679546	0.003253286	0.008339047	0.067318529	0.067965085	0.00740789	0.050327056	0.035562259	0.036783887	0.004403775	0.009569951	0.009280965	0.03035374	0.02273644	0.047546424	0.00650519	0.143096753	1.670440513	0.015471691	8.557469836	0.166833196	0.815211672	42.29053943	0.175981817	0.45038506	0.876697478	1.111677815	9.919848881	0.11393341	1.692513927	1.196090096	1.435971211	1.361729286	1.201179449	2.060247155	2.302767447	0.654392108	2.553583269	0.631215759	0.334975719	3.339646702	0.494153127
242	0913BAC_0021_A2	0.000534144	0.000856628	0.002505892	0.017247883	0.065191748	0.078048649	0.007351412	0.042545781	0.040830067	0.030190006	0.003126957	0.008780028	0.007128514	0.0300294	0.021216889	0.051763983	0.007329543	0.129327889	1.535981917	0.015741305	8.761947498	0.162451801	0.876894419	42.18312832	0.169789147	0.459305072	0.899006263	1.083230856	9.702426271	0.113076159	1.721420047	1.1778249	1.43514269	1.292941382	1.283919135	2.084210695	2.287068104	0.632755336	2.628604941	0.610904806	0.328493396	3.501899926	0.47807753
243	0913BAC_0037_A1	0.000659204	0.000904407	0.003351803	0.011586494	0.060790225	0.060623676	0.00874691	0.046324652	0.041046395	0.0313491	0.001982215	0.005390386	0.010186745	0.030001956	0.012477442	0.050108325	0.008616751	0.060814641	2.087144628	0.023059049	8.948939523	0.213250267	0.861856771	42.00732965	0.172642702	0.222606691	1.356570747	1.883179322	7.46090714	0.11318306	2.090675517	0.876213217	2.232611456	1.337161588	0.907872785	4.587879231	3.141438173	0.207683743	4.238677677	0.873832921	0.377609789	1.985643187	0.679178829
244	0913BAC_0037_A2	0.000772801		0.003640975	0.01259224	0.059242909	0.051409017	0.010674324	0.042528563	0.035810876	0.034778819	0.002548622	0.005971026	0.010001957	0.031425695	0.012786901	0.054302239	0.007598607	0.096734895	2.376085939	0.023092472	9.925784818	0.212897077	0.927464684	45.28205659	0.180715918	0.233509839	1.343810331	1.846481893	7.363934421	0.119552185	2.23883103	0.901177481	2.278615463	1.329268526	0.867518564	4.313203638	3.163910267	0.22290308	4.464564918	0.879695355	0.40211108	2.105740195	0.694232352
245	0913BAC_0035_A1	0.001017535	0.000680981	0.002681635	0.009018026	0.060236387	0.054549154	0.008072744	0.043834189	0.039357859	0.02237198	0.002487559	0.006967309	0.007416629	0.033024788	0.014397569	0.049715902	0.010051517	0.072285794	1.874589061	0.026255106	9.349151936	0.186674003	0.843433734	37.95089828	0.207778597	0.256923939	1.338278237	1.662940328	6.531998239	0.087463047	2.218950944	0.996274745	1.456019245	1.531591295	1.200704416	3.660636942	2.745355173	0.356621112	3.033549556	1.146036918	0.360966931	3.011001551	0.644971944
246	0913BAC_0035_A2	0.000494165	0.000733651	0.002145679	0.010450516	0.054321123	0.02926447	0.007770648	0.044010957	0.03370649	0.023141455	0.002350368	0.007530778	0.008891288	0.028868831	0.020812255	0.050863888	0.010065141	0.04932383	1.753451751	0.021140565	9.000045584	0.187531608	0.825243502	39.88476369	0.200415437	0.240943391	1.318803185	1.690630671	6.785513697	0.085412717	2.187126254	0.967282318	1.398835109	1.52504066	1.152949442	3.440377683	2.708579738	0.352866611	2.832974617	1.126162589	0.350658934	2.854163317	0.617772597
247	0913BAC_0038_A1	0.000962312	0.000922101	0.002665939	0.007570737	0.057908533	0.040246555	0.006437246	0.04058544	0.04037816	0.028901688	0.002299793	0.006117563	0.010412064	0.032942572	0.012067742	0.052058387	0.006472146	0.079605421	1.967350286	0.013458263	7.451072802	0.189324454	0.712289845	45.5680216	0.158213217	0.220735786	1.134266521	1.4950157	7.517163568	0.090756545	1.940354586	0.685320476	2.088796004	1.074074391	0.637798572	3.944482036	2.931008691	0.231738715	3.505599815	0.713647249	0.26854989	1.753492255	0.611997169
248	0913BAC_0038_A2	0.000755221	0.000383021	0.003146077	0.009905436	0.063691249	0.03399004	0.006245412	0.030673281	0.029448318	0.033725989	0.001938174	0.006245577	0.007934063	0.030669478	0.010010917	0.050979694	0.00620451	0.046144925	1.777506228	0.013894951	8.635259274	0.188783335	0.655714027	44.70937943	0.164362362	0.223766114	1.140565954	1.520180012	7.476023643	0.086234732	1.936930807	0.698840911	1.993737636	1.058155316	0.62804846	3.867415046	3.037726104	0.238410874	3.70610363	0.756516928	0.267532542	1.823269284	0.616110477
249	0913BAC_0036_A1	0.000930736	0.000418513	0.003877183	0.006630218	0.06123683	0.025685993	0.005040869	0.026365107	0.035867228	0.037034794	0.005294275	0.0072083	0.008404269	0.047693389	0.016218562	0.048201905	0.009575092	0.06023918	1.853023413	0.017071847	10.26499207	0.192410459	0.902053447	38.73594986	0.186337192	0.260736583	1.490502202	1.626444856	9.2065369	0.078457932	2.831992213	1.122825321	1.522312959	1.801374488	1.136033598	3.213321008	3.380820424	0.275600254	2.777485474	1.229412191	0.307843681	2.834539288	0.689958346
250	0913BAC_0036_A2	0.000544201	0.000420127	0.003076624	0.006821413	0.061056562	0.027577307	0.005026736	0.035807732	0.027174838	0.03721633	0.004169261	0.006176532	0.007898917	0.047042344	0.015776537	0.048606901	0.010898002	0.059636728	1.598992975	0.016166906	10.3748028	0.177775695	0.840380066	37.45307804	0.177721274	0.2647229	1.484918989	1.518024838	8.999459902	0.084241439	2.848150199	1.180303092	1.47564565	1.900512739	1.153793352	3.036796158	3.346356674	0.264380047	2.697515159	1.251818061	0.28838564	2.961142012	0.674107579
251	0913BAC_0005_A1	0.000593797	0.000787778	0.003411673	0.009875062	0.052824261	0.017824753	0.012095076	0.027403918	0.044283619	0.078153382	0.006261655	0.005485846	0.011010997	0.037022583	0.013934754	0.047778758	0.016635334	0.14693043	3.709657365	0.012549378	10.82255126	0.503161909	1.66139257	46.57679739	0.211282075	0.140920802	1.520893977	1.589097134	17.73927832	0.316643851	2.784672864	1.151949438	2.268397129	2.55518313	1.113551004	3.752312713	2.646395007	0.269077388	4.72842451	0.988813862	0.543624173	3.15212157	0.793579088
252	0913BAC_0005_A2	0.000750287	0.001084174	0.003553551	0.012894062	0.052161322	0.020792347	0.008605365	0.03148504	0.043536969	0.081232545	0.005307741	0.006368998	0.008224231	0.040814284	0.016325228	0.045667419	0.015885624	0.139300778	3.755154189	0.013952483	9.96618662	0.523053722	1.560476932	45.43702346	0.233951915	0.134107633	1.531172085	1.624249972	17.75469931	0.30433663	2.781006397	1.145756956	2.36397743	2.564513026	1.168931567	3.695079295	2.67162271	0.26648846	4.926088378	0.989824081	0.537044057	3.070660536	0.766379897
253	0913BAC_01QC_K1	0.000879482	0.000976971	0.00328703	0.009930272	0.09746013	0.063308987	0.00718015	0.042285595	0.047344787	0.039941698	0.004511686	0.006728834	0.010150372	0.046791411	0.020932102	0.056091854	0.012862624	0.117588166	2.354952449	0.025402795	10.22806548	0.316104322	1.192988776	43.59211715	0.204974309	0.298343342	1.295379591	1.645683735	9.642777157	0.161787876	2.256637705	1.21056628	2.024726735	2.212791023	1.242712455	3.085112768	3.24259426	0.576186639	3.344196785	0.921912294	0.433788974	3.206192973	0.697206582
265	0913BAC_01QC_L1	0.00186584	0.000870869	0.002348811	0.009122617	0.05017735	0.0609459	0.006785452	0.032822017	0.038193897	0.037667991	0.006353823	0.010530768	0.008474771	0.033415851	0.018291683	0.057920727	0.010994156	0.103172667	2.24017903	0.023202225	8.501365429	0.251516758	1.048046868	36.68051083	0.1698564	0.250660643	1.221537147	1.388136946	8.400770218	0.127078041	1.961932514	1.114946347	1.825956841	1.763701279	1.058522633	2.678196787	2.779915074	0.473566392	3.107606327	0.793732132	0.352398978	2.629509114	0.576871266
